# Supplementary material for: A Klebsiella pneumoniae antibiotic resistance mechanism that subdues host defences and promotes virulence
Source: PubMed Central journal article supplement (PMC5376759; doi:10.15252/emmm.201607336), 2017-02-15
Supplement: EMMM-9-430-s001.pdf [file EMMM-9-430-s001.pdf]

# **Appendix: A *Klebsiella pneumoniae* antibiotic resistance mechanism that subdues host defences and promotes virulence.**

Timothy J Kidd, Grant Mills, Joana Sá-Pessoa, Amy Dumigan, Christian Frank, José L Insua, Rebecca Ingram, Laura Hobley and José A Bengoechea

## **Table of Contents**

|                           |    |
|---------------------------|----|
| Appendix Figure S1. ....  | 2  |
| Appendix Table S1. ....   | 3  |
| Appendix Table S2. ....   | 4  |
| Appendix Table S3. ....   | 5  |
| Appendix Figure S2. ....  | 7  |
| Appendix Figure S3. ....  | 8  |
| Appendix Figure S4. ....  | 9  |
| Appendix Figure S5. ....  | 10 |
| Appendix Figure S6. ....  | 11 |
| Appendix Figure S7. ....  | 12 |
| Appendix Figure S8. ....  | 13 |
| Appendix Table S4. ....   | 15 |
| Appendix References. .... | 16 |

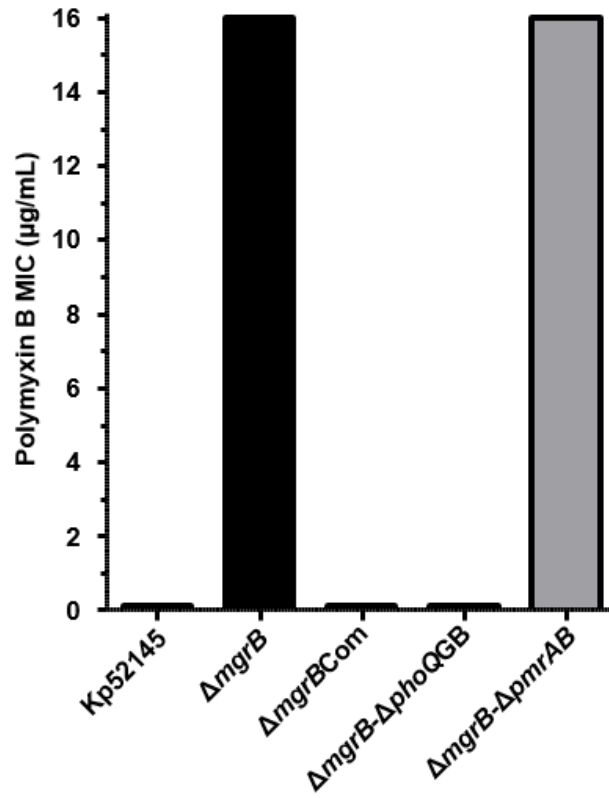

**Appendix Figure S1.**

Etest<sup>®</sup> minimal inhibitory concentrations (MIC) to polymyxin B of the *Klebsiella pneumoniae* 52145, 52145-ΔmgrB, 52145-ΔmgrBCom, 52145-ΔmgrB-ΔphoQGB and 52145-ΔmgrB-ΔpmrAB strains.

| Strain                               | Observed ion ( <i>m/z</i> ) | Acyl substitution | Proposed fatty acid, phosphate and carbohydrate composition <sup>a</sup> |
|--------------------------------------|-----------------------------|-------------------|--------------------------------------------------------------------------|
| 52145 (wild-type)                    | 1824                        | Hexa-acyl         | 4x C14:0(3-OH), 2x C14:0, 2P                                             |
|                                      | 1840                        | Hexa-acyl         | 4x C14:0(3-OH), 1x C14:0, 1x C14:0(3-OH), 2P                             |
|                                      | 2063                        | Hepta-acyl        | 4x C14:0(3-OH), 2x C14:0, 1x C16:0, 2P                                   |
| 52145- <i>ΔmgrB</i>                  | 1824                        | Hexa-acyl         | 4x C14:0(3-OH), 2x C14:0, 2P                                             |
|                                      | 1840                        | Hexa-acyl         | 4x C14:0(3-OH), 1x C14:0, 1x C14:0(3-OH), 2P                             |
|                                      | 1852                        | Hexa-acyl         | 4x C14:0(3-OH), 1x C14:0, 1x C16:0, 2P                                   |
|                                      | 1866                        | Hexa-acyl         | 4x C14:0(3-OH), 1x C14:0(3-OH), 1x C16:0, 2P                             |
|                                      | 1948                        | Hexa-acyl         | 4x C14:0(3-OH), 2x C14:0, 1x PEtN, 2P                                    |
|                                      | 1955                        | Hexa-acyl         | 4x C14:0(3-OH), 2x C14:0, 1x Ara4N, 2P                                   |
|                                      | 2063                        | Hepta-acyl        | 4x C14:0(3-OH), 2x C14:0, 1x C16:0, 2P                                   |
|                                      | 2079                        | Hepta-acyl        | 4x C14:0(3-OH), 1x C14:0, 1x C14:0(3-OH), 1x C16:0, 2P                   |
| 52145- <i>ΔmgrBCom</i>               | 1824                        | Hexa-acyl         | 4x C14:0(3-OH), 2x C14:0, 2P                                             |
|                                      | 1840                        | Hexa-acyl         | 4x C14:0(3-OH), 1x C14:0, 1x C14:0(3-OH), 2P                             |
|                                      | 2063                        | Hepta-acyl        | 4x C14:0(3-OH), 2x C14:0, 1x C16:0, 2P                                   |
| 52145- <i>ΔmgrB-ΔphoQGB</i>          | 1797                        | Hexa-acyl         | 4x C14:0(3-OH), 1x C14:0, 1x C12:0, 2P                                   |
|                                      | 1824                        | Hexa-acyl         | 4x C14:0(3-OH), 2x C14:0, 2P                                             |
|                                      | 1840                        | Hexa-acyl         | 4x C14:0(3-OH), 1x C14:0, 1x C14:0(3-OH), 2P                             |
|                                      | 2063                        | Hepta-acyl        | 4x C14:0(3-OH), 2x C14:0, 1x C16:0, 2P                                   |
| 52145- <i>ΔmgrB-ΔpmrAB</i>           | 1824                        | Hexa-acyl         | 4x C14:0(3-OH), 2x C14:0, 2P                                             |
|                                      | 1840                        | Hexa-acyl         | 4x C14:0(3-OH), 1x C14:0, 1x C14:0(3-OH), 2P                             |
|                                      | 1852                        | Hexa-acyl         | 4x C14:0(3-OH), 1x C14:0, 1x C16:0, 2P                                   |
|                                      | 1866                        | Hexa-acyl         | 4x C14:0(3-OH), 1x C14:0(3-OH), 1x C16:0, 2P                             |
|                                      | 1948                        | Hexa-acyl         | 4x C14:0(3-OH), 2x C14:0, 1x PEtN, 2P                                    |
|                                      | 1955                        | Hexa-acyl         | 4x C14:0(3-OH), 2x C14:0, 1x Ara4N, 2P                                   |
|                                      | 2063                        | Hepta-acyl        | 4x C14:0(3-OH), 2x C14:0, 1x C16:0, 2P                                   |
|                                      | 2079                        | Hepta-acyl        | 4x C14:0(3-OH), 1x C14:0, 1x C14:0(3-OH), 1x C16:0, 2P                   |
| 52145- <i>ΔmgrB-ΔphoQGB-ΔpmrAB</i>   | 1797                        | Hexa-acyl         | 4x C14:0(3-OH), 1x C14:0, 1x C12:0, 2P                                   |
|                                      | 1824                        | Hexa-acyl         | 4x C14:0(3-OH), 2x C14:0, 2P                                             |
|                                      | 1840                        | Hexa-acyl         | 4x C14:0(3-OH), 1x C14:0, 1x C14:0(3-OH), 2P                             |
|                                      | 2063                        | Hepta-acyl        | 4x C14:0(3-OH), 2x C14:0, 1x C16:0, 2P                                   |
| 52145- <i>ΔmgrB-ΔphoQGB-phoPQCom</i> | 1824                        | Hexa-acyl         | 4x C14:0(3-OH), 2x C14:0, 2P                                             |
|                                      | 1840                        | Hexa-acyl         | 4x C14:0(3-OH), 1x C14:0, 1x C14:0(3-OH), 2P                             |
|                                      | 1852                        | Hexa-acyl         | 4x C14:0(3-OH), 1x C14:0, 1x C16:0, 2P                                   |
|                                      | 1866                        | Hexa-acyl         | 4x C14:0(3-OH), 1x C14:0(3-OH), 1x C16:0, 2P                             |
|                                      | 1948                        | Hexa-acyl         | 4x C14:0(3-OH), 2x C14:0, 1x PEtN, 2P                                    |
|                                      | 1955                        | Hexa-acyl         | 4x C14:0(3-OH), 2x C14:0, 1x Ara4N, 2P                                   |
|                                      | 2063                        | Hepta-acyl        | 4x C14:0(3-OH), 2x C14:0, 1x C16:0, 2P                                   |
|                                      | 2079                        | Hepta-acyl        | 4x C14:0(3-OH), 1x C14:0, 1x C14:0(3-OH), 1x C16:0, 2P                   |

<sup>a</sup> C14:0(3-OH), R-3-hydroxymyristoyl acyl chain; C14:0, myristate acyl chain; P, phosphate; C16:0, palmitate; PEtN, phosphoethanolamine; Ara4N, 4-amino-4-deoxy-l-arabinose; C12:0, laurate.

### Appendix Table S1.

Lipid A species identified by negative-ion MALDI-TOF mass spectrometry analysis among the *Klebsiella pneumoniae* 52145 strains when grown in LB medium at 37°C.

| Strain <sup>a</sup> | Origin   | Colistin susceptibility | <i>mgrB</i> sequence mutation <sup>b</sup> | Additional antimicrobial resistance determinants <sup>c</sup> | Multilocus sequence type |
|---------------------|----------|-------------------------|--------------------------------------------|---------------------------------------------------------------|--------------------------|
| T1a                 | Turkey   | Sensitive               | Wild-type                                  | KPC-2                                                         | ST-258                   |
| T1b                 | Turkey   | Resistant               | Truncated by IS5-like                      | KPC-2                                                         | ST-258                   |
| C21                 | Colombia | Resistant               | Truncated by ISKpn13                       | CTX-M-2                                                       | ST-1271                  |
| C22                 | Colombia | Resistant               | Truncated by ISKpn14                       | CTX-M-15                                                      | ST-101                   |
| C2                  | Colombia | Resistant               | Truncated by IS10R                         | KPC-2                                                         | ST-258                   |
| 15I5                | France   | Resistant               | Truncated protein (29 aa)                  | -                                                             | ST-70                    |

<sup>a</sup> Strain designation and isolates were identical to those reported by Poirel *et al* (Poirel et al, 2015)

<sup>b</sup> IS, insertion sequence, aa, amino acid

<sup>c</sup> KPC, *Klebsiella pneumoniae* carbapenemase 2; CTX-M, CTX-M extended spectrum beta-lactamase

### Appendix Table S2.

Origins, characteristics and genotypes of the clinical *Klebsiella pneumoniae* strains used in this study.

| Bacterial strain or plasmid                                                     | Genotype or comments <sup>a</sup>                                                                                                                                                            | Source or reference(s)   |
|---------------------------------------------------------------------------------|----------------------------------------------------------------------------------------------------------------------------------------------------------------------------------------------|--------------------------|
| Strains                                                                         |                                                                                                                                                                                              |                          |
| <i>Escherichia coli</i>                                                         |                                                                                                                                                                                              |                          |
| C600                                                                            | <i>thi thr leuB tonA lacY supE</i>                                                                                                                                                           |                          |
| GT115                                                                           | F <sup>mcrA</sup> Δ( <i>mrr-hsdRMS-mcrBC</i> ) ϕ80Δ <i>lacZ</i> ΔM15 Δ <i>lacX74 recA1rpsL</i> (StrA) <i>endA1</i> Δ <i>dcm uidA</i> (Δ <i>MluI</i> )::<br><i>pir-116</i> Δ <i>sbcC-sbcD</i> | InvivoGen                |
| SY327                                                                           | λ ( <i>lac pro</i> ) <i>argE</i> ( <i>Am</i> ) <i>rif nalA recA56</i> (λ <i>pir</i> )                                                                                                        | Miller, 1988             |
| β2163                                                                           | (F) RP4-2-Tc::Mu Δ <i>dapA</i> ::( <i>erm-pir</i> ) [Km <sup>R</sup> Em <sup>R</sup> ]                                                                                                       | Demarre, 2005            |
| <i>Klebsiella pneumoniae</i>                                                    |                                                                                                                                                                                              |                          |
| 52145                                                                           | Clinical isolate; serotype O1:K2; sequence type ST66                                                                                                                                         | Brisse, 2009; Lery, 2014 |
| 52145-Δ <i>mgrB</i>                                                             | Kp52145, Δ <i>mgrB</i> ; the <i>mgrB</i> gene was inactivated                                                                                                                                | This study               |
| 52145-Δ <i>mgrB</i> Com                                                         | 52145-Δ <i>mgrB</i> complemented with mini-Tn7TKmKp52145 <i>mgrB</i> ; <i>mgrB</i> activity was restored                                                                                     | This study               |
| 52145-Δ <i>pmrC</i>                                                             | Kp52145, Δ <i>pmrC</i> ; the <i>pmrC</i> gene was inactivated                                                                                                                                | This study               |
| 52145-Δ <i>pagP</i>                                                             | Kp52145, Δ <i>pagP</i> ; the <i>pagP</i> gene was inactivated                                                                                                                                | This study               |
| 52145-Δ <i>manC</i>                                                             | Kp52145, Δ <i>manC</i> ; the <i>manC</i> gene was inactivated; no CPS expression                                                                                                             | This study               |
| 52145-Δ <i>mgrB</i> -Δ <i>phoQ</i> GB                                           | Kp52145, Δ <i>mgrB</i> , Δ <i>phoQ</i> ::KM-GenBlock; the <i>mgrB</i> and <i>phoQ</i> genes were inactivated; Km <sup>R</sup>                                                                | This study               |
| 52145-Δ <i>mgrB</i> -Δ <i>pmrAB</i>                                             | Kp52145, Δ <i>mgrB</i> , Δ <i>pmrAB</i> ; the <i>mgrB</i> and <i>pmrAB</i> genes were inactivated                                                                                            | This study               |
| 52145-Δ <i>mgrB</i> -Δ <i>phoQ</i> GB- <i>phoPQ</i> Com                         | 52145-Δ <i>mgrB</i> -Δ <i>phoQ</i> GB complemented with pGP-Tn7-Cm_KpnPhoPQCom; <i>phoPQ</i> activity was restored                                                                           | This study               |
| 52145-Δ <i>mgrB</i> -Δ <i>lpxO</i>                                              | Kp52145, Δ <i>mgrB</i> , Δ <i>lpxO</i> ; the <i>mgrB</i> and <i>lpxO</i> genes were inactivated                                                                                              | This study               |
| 52145-Δ <i>pagP</i> -Δ <i>mgrB</i>                                              | Kp52145, Δ <i>pagP</i> , Δ <i>mgrB</i> ; the <i>pagP</i> and <i>mgrB</i> genes were inactivated                                                                                              | This study               |
| 52145-Δ <i>pmrC</i> -Δ <i>mgrB</i>                                              | Kp52145, Δ <i>pmrC</i> , Δ <i>mgrB</i> ; the <i>pmrC</i> and <i>mgrB</i> genes were inactivated                                                                                              | This study               |
| 52145-Δ <i>mgrB</i> -Δ <i>pmrF</i>                                              | Kp52145, Δ <i>mgrB</i> , Δ <i>pmrF</i> ; the <i>mgrB</i> and <i>pmrF</i> genes were inactivated                                                                                              | This study               |
| 52145-Δ <i>mgrB</i> -Δ <i>manC</i>                                              | Kp52145, Δ <i>mgrB</i> , Δ <i>manC</i> ; the <i>mgrB</i> and <i>manC</i> genes were inactivated; no CPS expression                                                                           | This study               |
| 52145-Δ <i>pmrC</i> -Δ <i>lpxO</i> -Δ <i>mgrB</i>                               | Kp52145, Δ <i>pmrC</i> , Δ <i>lpxO</i> , Δ <i>mgrB</i> ; the <i>pmrC</i> , <i>lpxO</i> and <i>mgrB</i> genes were inactivated                                                                | This study               |
| 52145-Δ <i>mgrB</i> -Δ <i>lpxO</i> -Δ <i>pmrF</i>                               | Kp52145, Δ <i>mgrB</i> , Δ <i>lpxO</i> , Δ <i>pmrF</i> ; the <i>mgrB</i> , <i>lpxO</i> and <i>pmrF</i> genes were inactivated                                                                | This study               |
| 52145-Δ <i>pmrC</i> -Δ <i>lpxO</i> -Δ <i>mgrB</i> -Δ <i>pmrF</i>                | Kp52145, Δ <i>pmrC</i> , Δ <i>lpxO</i> , Δ <i>mgrB</i> , Δ <i>pmrF</i> ; the <i>pmrC</i> , <i>lpxO</i> , <i>mgrB</i> and <i>pmrF</i> genes were inactivated                                  | This study               |
| 52145-Δ <i>pmrC</i> -Δ <i>lpxO</i> -Δ <i>mgrB</i> -Δ <i>pmrF</i> -Δ <i>pagP</i> | Kp52145, Δ <i>pmrC</i> , Δ <i>lpxO</i> , Δ <i>mgrB</i> , Δ <i>pagP</i> ; the <i>pmrC</i> , <i>lpxO</i> , <i>mgrB</i> , <i>pmrF</i> and <i>pagP</i> genes were inactivated                    | This study               |
| 52145-Δ <i>mgrB</i> -Δ <i>lpxO</i> - <i>lpxO</i> Com                            | 52145-Δ <i>mgrB</i> Δ <i>lpxO</i> complemented with pGP-Tn7-Cm_KpnLpxOCom; <i>lpxO</i> activity was restored                                                                                 | This study               |

*Continued*

---

Plasmids

|                                          |                                                                                                                         |                |
|------------------------------------------|-------------------------------------------------------------------------------------------------------------------------|----------------|
| pGEM-T Easy                              | Cloning plasmid; Amp <sup>R</sup>                                                                                       | Promega        |
| pGPI-SceI-2                              | Suicide vector, R6Ky origin of replication, Mob <sup>+</sup> , carries a I-SceI endonuclease site; Tmp <sup>R</sup>     | Aubert, 2014   |
| pDAI-SceI-SacB                           | Expresses the I-SceI endonuclease, <i>sacB</i> gene; Tet <sup>R</sup>                                                   | Aubert, 2014   |
| pKD4                                     | PCR template plasmid for the $\lambda$ Red recombinase system; Km <sup>R</sup>                                          | Datsenko, 2000 |
| pKOBEG-sacB                              | $\lambda$ phage <i>red<math>\gamma\beta\alpha</math></i> , arabinose inducible; Cm <sup>R</sup>                         | Derbise, 2003  |
| pTSNSK-Tp                                | pTSNSK-Tp containing a transposase for Tn7 insertion; Km <sup>R</sup> , Tmp <sup>R</sup>                                | Crépin, 2012   |
| pUC18R6KT-mini-Tn7TKm                    | pUC18R6KT-mini-Tn7T complementation vector; Amp <sup>R</sup> , Km <sup>R</sup>                                          | Choi, 2005     |
| pGP-Tn7-Cm                               | pGP-Tn7 complementation vector; Amp <sup>R</sup> , Cm <sup>R</sup>                                                      | Crépin, 2012   |
| pMAKSACB                                 | Suicide vector, Psc101 replication origin, Mob <sup>+</sup> , <i>sacB</i> gene; Cm <sup>R</sup>                         | Favre, 2000    |
| pFLP2                                    | Plasmid encoding FLP to remove cassettes between FRT sites, <i>sacB</i> gene; Tmp <sup>R</sup>                          | Hoang, 1998    |
| pGPL01                                   | Firefly luciferase ( <i>lucFF</i> ) transcriptional fusion suicide vector, R6Ky origin of replication; Amp <sup>R</sup> | Gunne, 1996    |
| pGEM $\Delta$ <i>mgrB</i>                | pGEM-T Easy containing $\Delta$ <i>mgrB</i> ; Amp <sup>R</sup>                                                          | This study     |
| pGEM $\Delta$ <i>pmrAB</i>               | pGEM-T Easy containing $\Delta$ <i>pmrAB</i> ; Amp <sup>R</sup>                                                         | This study     |
| pGEM $\Delta$ <i>manC</i>                | pGEM-T Easy containing $\Delta$ <i>manC</i> ; Amp <sup>R</sup>                                                          | This study     |
| pGEM $\Delta$ <i>pmrF</i>                | pGEM-T Easy containing $\Delta$ <i>pmrF</i> ; Amp <sup>R</sup>                                                          | This study     |
| pGEM $\Delta$ <i>pagP</i>                | pGEM-T Easy containing $\Delta$ <i>pagP</i> ; Amp <sup>R</sup>                                                          | This study     |
| pGPI-SceI-2 $\Delta$ <i>mgrB</i>         | pGPI-SceI-2 containing $\Delta$ <i>mgrB</i> ; Tmp <sup>R</sup>                                                          | This study     |
| pGPI-SceI-2 $\Delta$ <i>pmrAB</i>        | pGPI-SceI-2 containing $\Delta$ <i>pmrAB</i> ; Tmp <sup>R</sup>                                                         | This study     |
| pGPI-SceI-2 $\Delta$ <i>manC</i>         | pGPI-SceI-2 containing $\Delta$ <i>manC</i> ; Tmp <sup>R</sup>                                                          | This study     |
| pGPI-SceI-2 $\Delta$ <i>pmrF</i>         | pGPI-SceI-2 containing $\Delta$ <i>pmrF</i> ; Tmp <sup>R</sup>                                                          | This study     |
| pGPI-SceI-2 $\Delta$ <i>pagP</i>         | pGPI-SceI-2 containing $\Delta$ <i>pagP</i> ; Tmp <sup>R</sup>                                                          | This study     |
| pMAKSACB $\Delta$ <i>lpxO</i>            | pMAKSACB containing $\Delta$ <i>lpxO</i> ; Km <sup>R</sup>                                                              | This study     |
| pUC18R6KT-mini-Tn7TKmKp52145 <i>mgrB</i> | pUC18R6KT-mini-Tn7TKm containing <i>mgrB</i> gene for complementation; Amp <sup>R</sup> , Km <sup>R</sup>               | This study     |
| pGP-Tn7-Cm_KpnPhoPQCom                   | pGP-Tn7-Cm containing <i>phoPQ</i> operon for complementation; Amp <sup>R</sup> , Cm <sup>R</sup>                       | Llobet, 2015   |
| pGP-Tn7-Cm_KpnLpxOCom                    | pGP-Tn7-Cm containing <i>lpxO</i> gene for complementation; Amp <sup>R</sup> , Cm <sup>R</sup>                          | Llobet, 2015   |
| pGPLKpnProLpxO                           | pGPL01 containing the <i>lpxO</i> promoter region; Amp <sup>R</sup>                                                     | Llobet, 2015   |
| pGPLKpnProPmrH                           | pGPL01 containing the <i>pmrH</i> promoter region; Amp <sup>R</sup>                                                     | Llobet, 2011   |
| pGPLKpnProPmrC                           | pGPL01 containing the <i>pmrC</i> promoter region; Amp <sup>R</sup>                                                     | Insua, 2013    |
| pGPLKpnProPagP                           | pGPL01 containing the <i>pagP</i> promoter region; Amp <sup>R</sup>                                                     | This study     |
| pGPLKpnProPhoP                           | pGPL01 containing the <i>phoP</i> promoter region; Amp <sup>R</sup>                                                     | Llobet, 2011   |
| pGPLKpnProcps                            | pGPL01 containing the <i>cps</i> promoter region; Amp <sup>R</sup>                                                      | Llobet, 2011   |

<sup>a</sup> Km<sup>R</sup>, kanamycin resistant; Em<sup>R</sup>, erythromycin resistant; Tmp<sup>R</sup>, trimethoprim resistant; Amp<sup>R</sup>, ampicillin resistant; Tet<sup>R</sup>, tetracycline resistant; Cm<sup>R</sup>, chloramphenicol resistant

### Appendix Table S3.

Bacterial strains and plasmids used in this study

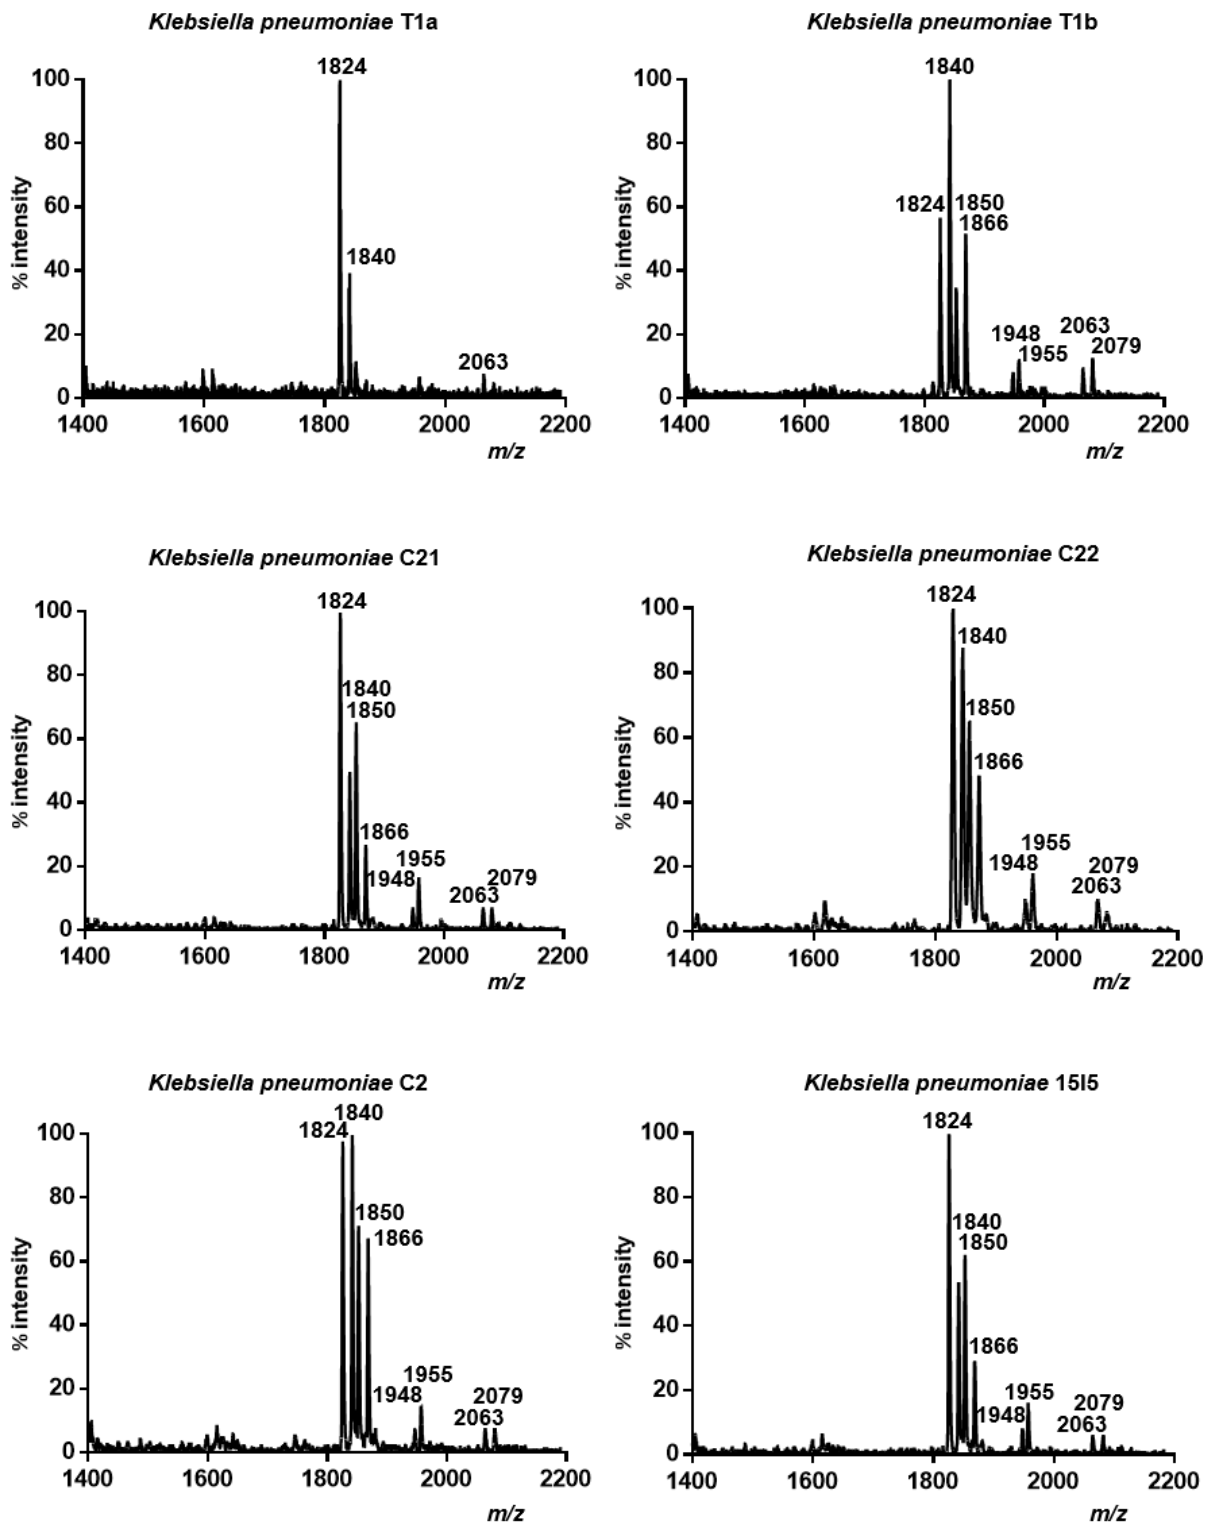

**Appendix Figure S2.**

Negative ion MALDI-TOF mass spectrometry spectra of lipid A isolated from the clinical *Klebsiella pneumoniae* T1a (A), T1b (B), C21 (C), C22 (D), C2 (E) and 1515 (F) strains. Data represent the mass to charge ( $m/z$ ) ratios of each lipid A species detected and were representative of three independent lipid A extractions.

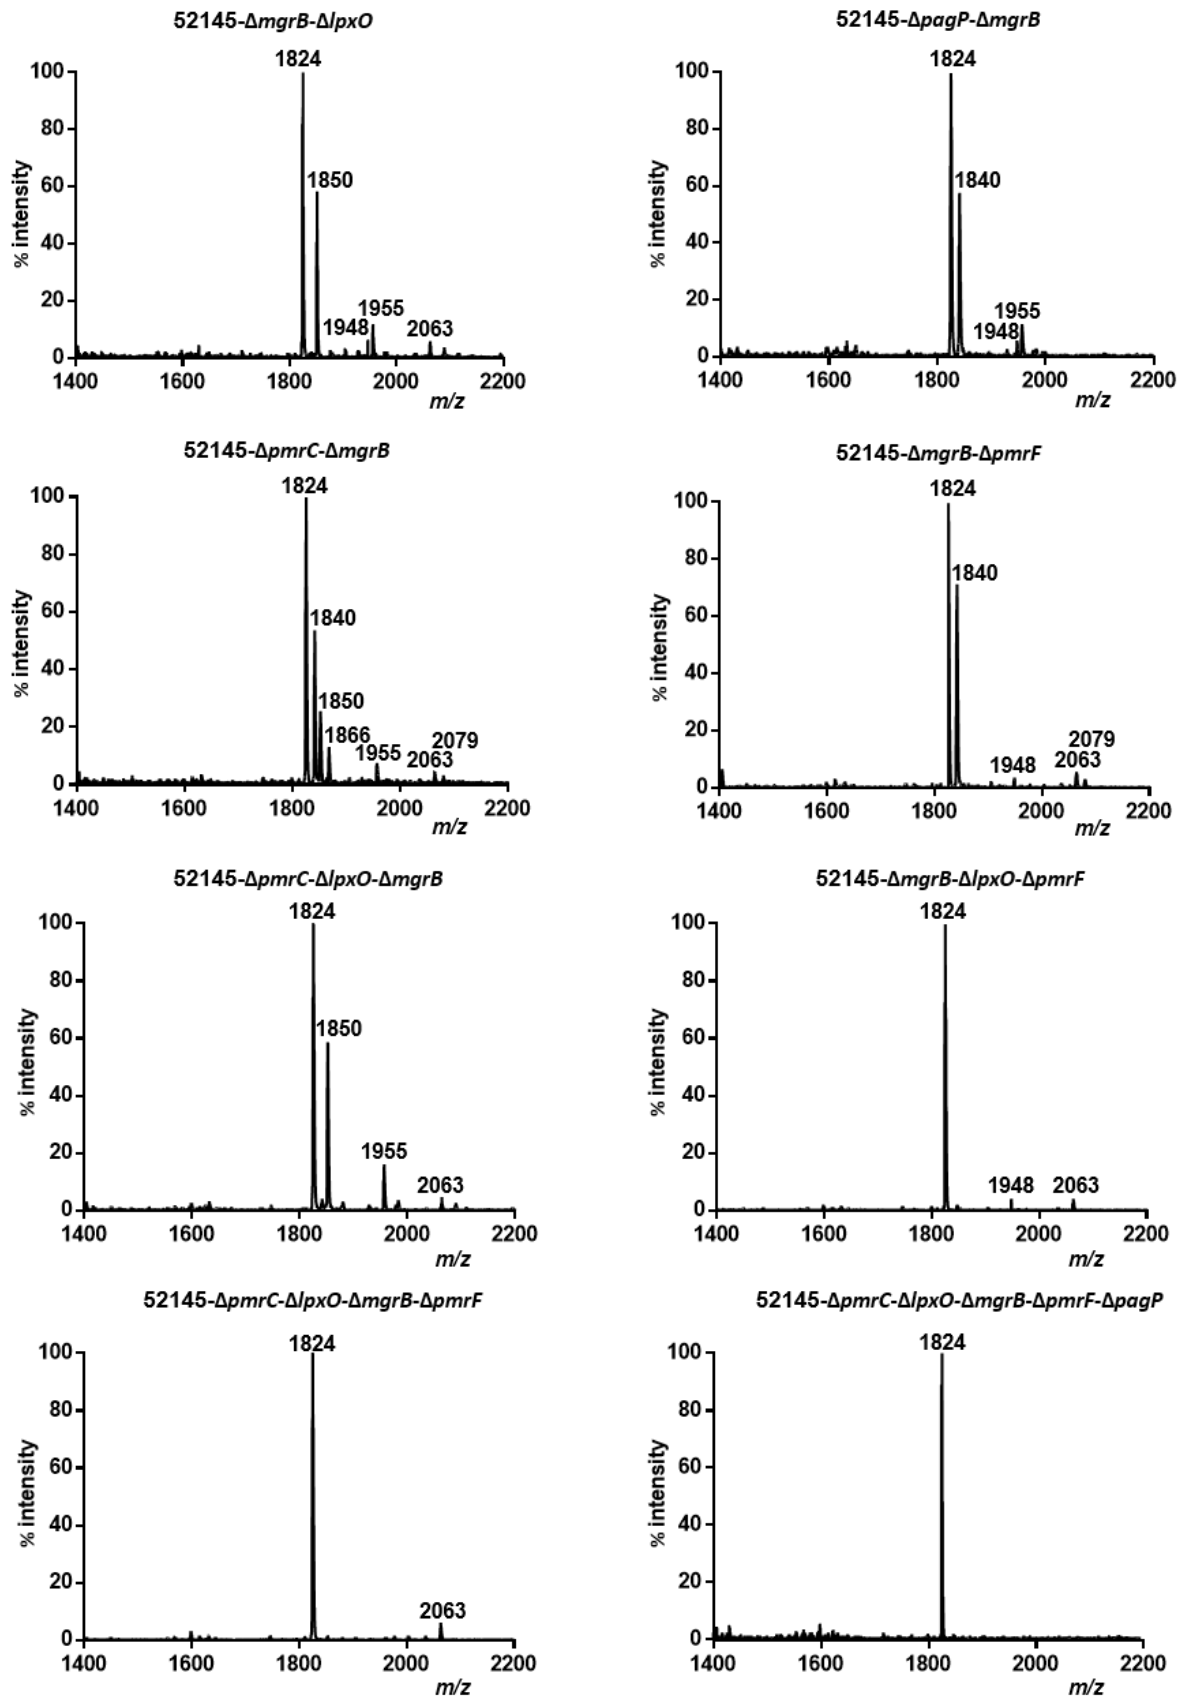

### Appendix Figure S3.

Negative ion MALDI-TOF mass spectrometry spectra of lipid A isolated from the *Klebsiella pneumoniae* 52145- $\Delta mgrB$ - $\Delta lpxO$ , 52145- $\Delta pagP$ - $\Delta mgrB$ , 52145- $\Delta pmrC$ - $\Delta mgrB$ , 52145- $\Delta mgrB$ - $\Delta pmrF$ , 52145- $\Delta pmrC$ - $\Delta lpxO$ - $\Delta mgrB$ , 52145- $\Delta mgrB$ - $\Delta lpxO$ - $\Delta pmrF$ , 52145- $\Delta pmrC$ - $\Delta lpxO$ - $\Delta mgrB$ - $\Delta pmrF$  and 52145- $\Delta pmrC$ - $\Delta lpxO$ - $\Delta mgrB$ - $\Delta pmrF$ - $\Delta pagP$  strains. Data represent the mass to charge ( $m/z$ ) ratios of each lipid A species detected and were representative of three independent lipid A extractions.



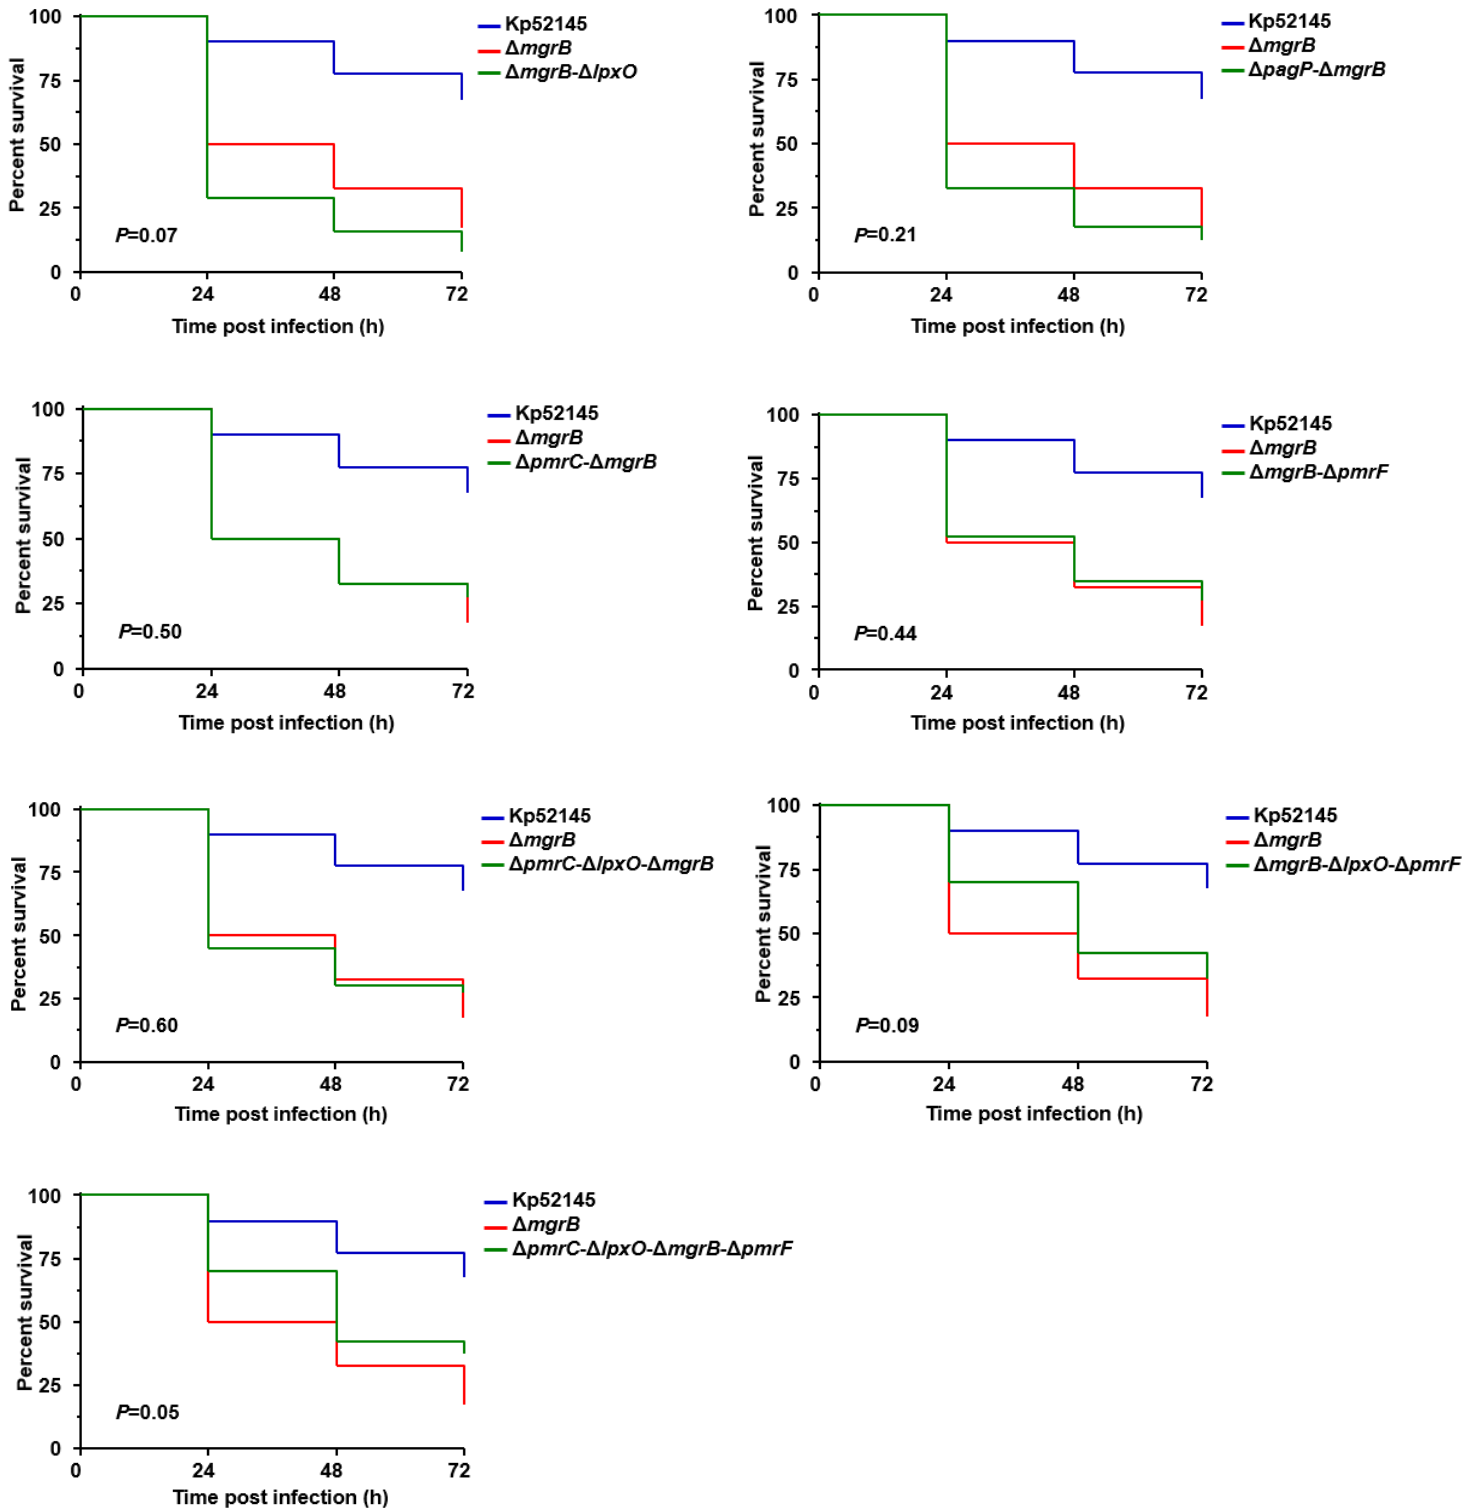

#### Appendix Figure S4.

Kaplan-Meier plots showing the percent survival of *Galleria mellonella* over 72 hours post-infection with  $10^5$  organisms of *Klebsiella pneumoniae* 52145 (blue), 52145- $\Delta mgrB$  (red), and the seven double, triple and quadruple mutant (green) strains. Forty larvae were infected in each group. Level of significance was determined using the log-rank (Mantel-Cox) test with Bonferroni correction ( $\alpha=0.017$ ). P-values presented correspond to the difference between 52145- $\Delta mgrB$  and the various multiple mutant strains.

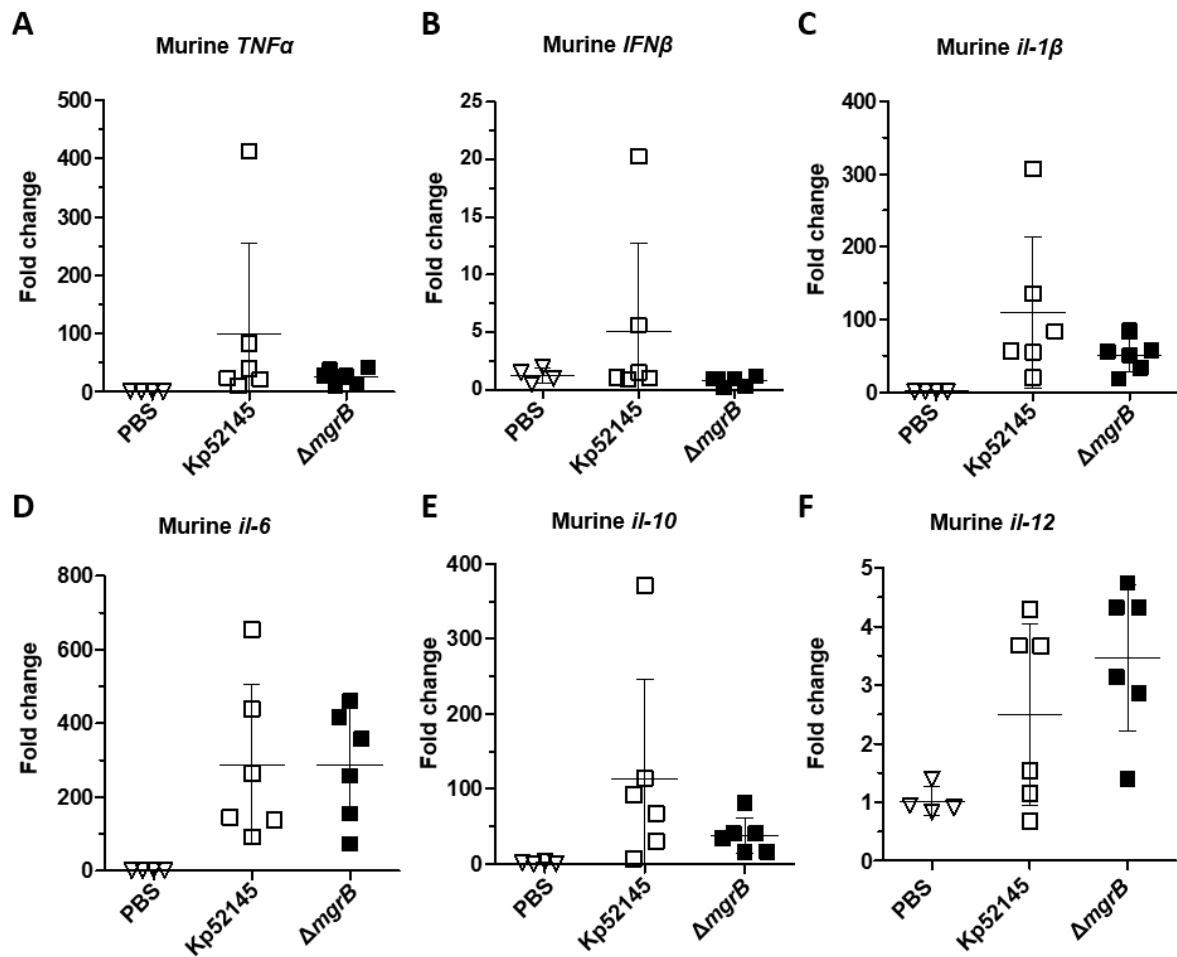

### Appendix Figure S5.

Expression of murine tissue necrosis factor-alpha (*TNFα*; A), interferon-beta (*IFNβ*; B), interleukin [il] 1-beta (*il-1β*; C), *il-6* (D), *il-10* (E) and *il-12* (F) produced in the lung after 24 hours infection with *Klebsiella pneumoniae* 52145 and 52145- $\Delta mgrB$  as determined by reverse transcriptase quantitative real-time PCR (n=4 PBS vehicle controls, n=6 infected mice per group). Values are presented as the mean  $\pm$  SD of two independent cDNA preparations measured in duplicate. Level of significance versus Kp52145 was determined using the two-way Unpaired t-test.

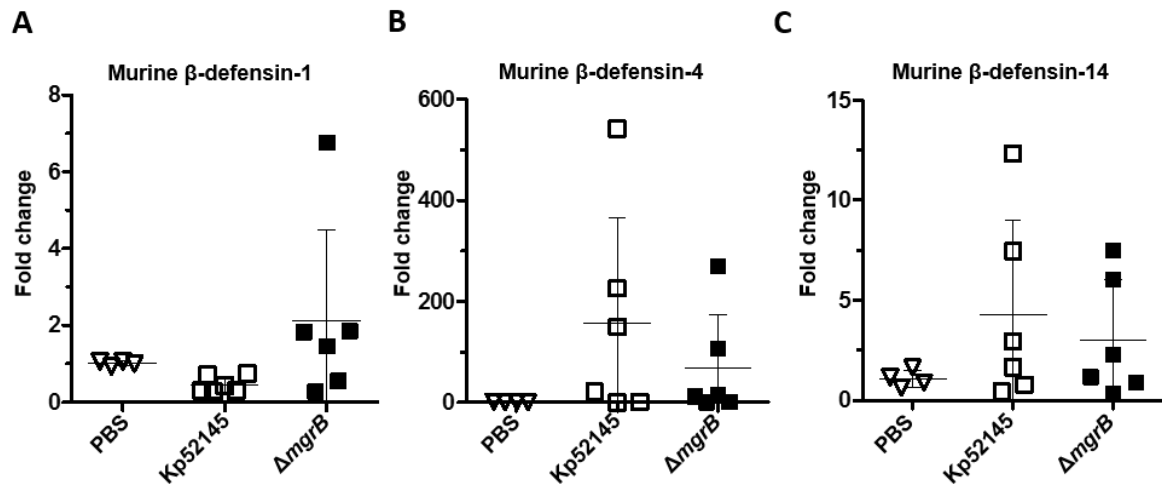

### Appendix Figure S6.

Expression of the murine antimicrobial peptides beta defensin-1 (A), beta defensin-4 (B) and beta defensin-14 (C) produced in the lung after 24 hours infection with 52145 and 52145- $\Delta mgrB$  as determined by reverse transcriptase quantitative real-time PCR (n=4 PBS vehicle controls, n=6 infected mice per group). Values are presented as the mean  $\pm$  SD of two independent cDNA preparations measured in duplicate. Level of significance versus Kp52145 was determined using the two-way Unpaired t-test.

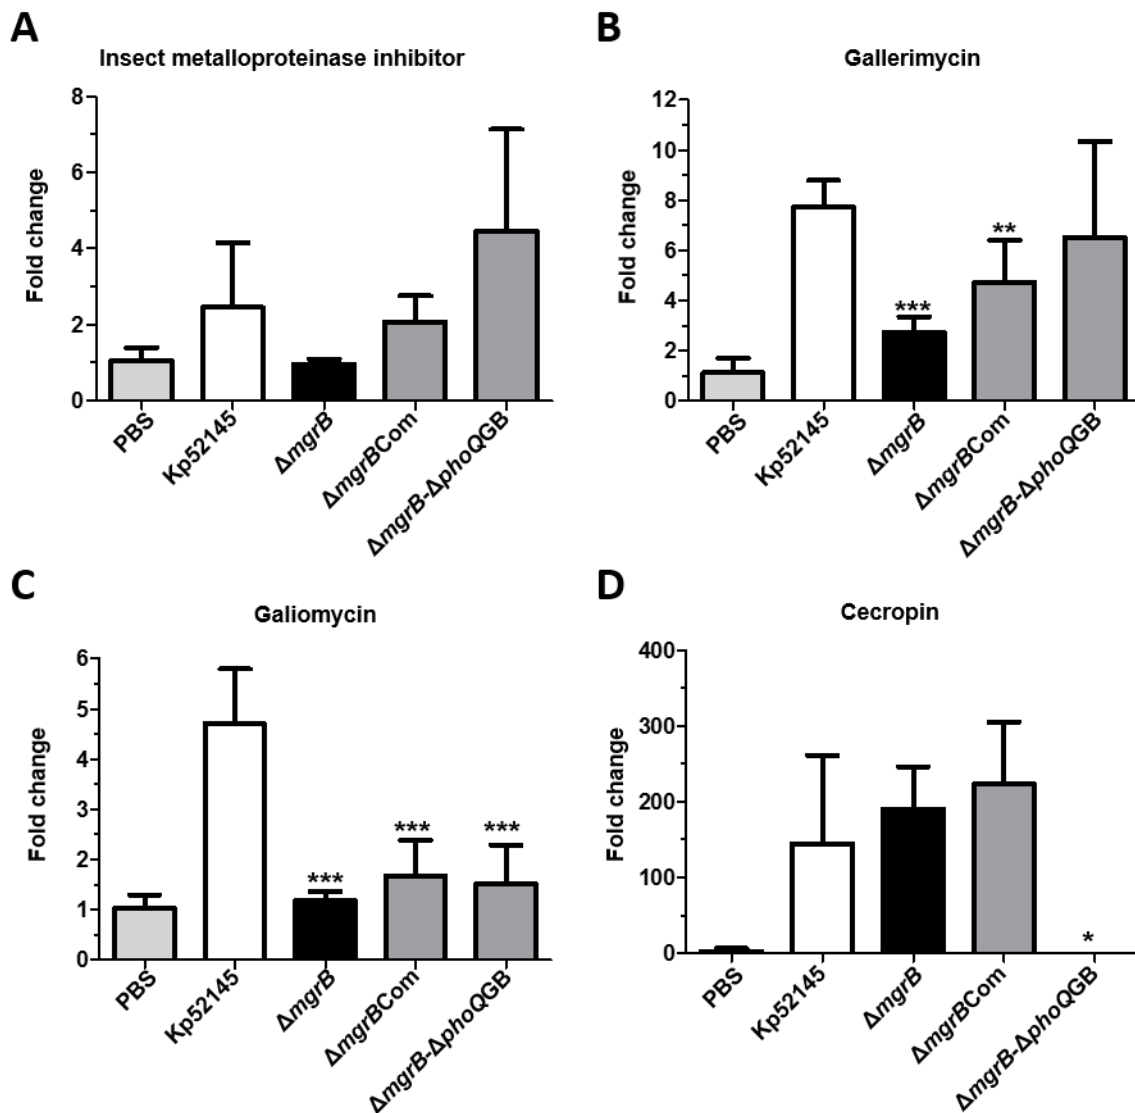

### Appendix Figure S7.

Expression of insect metalloproteinase inhibitor (A), gallerimycin (B), galiomycin (C) and cecropin (D) produced by *Galleria mellonella* after eight hours infection with *Klebsiella pneumoniae* 52145, 52145- $\Delta mgrB$ , 52145- $\Delta mgrBCom$  and 52145- $\Delta mgrB-\Delta phoQGB$  as determined by reverse transcriptase quantitative real-time PCR. Three larvae per group were infected and values are presented as the mean  $\pm$  SD of two independent cDNA preparations measured in duplicate. \*,  $P=0.01$ ; \*\*,  $P=0.004$ , \*\*\*,  $P\leq 0.0002$ ; versus Kp52145 determined using the two-way Unpaired t-test.

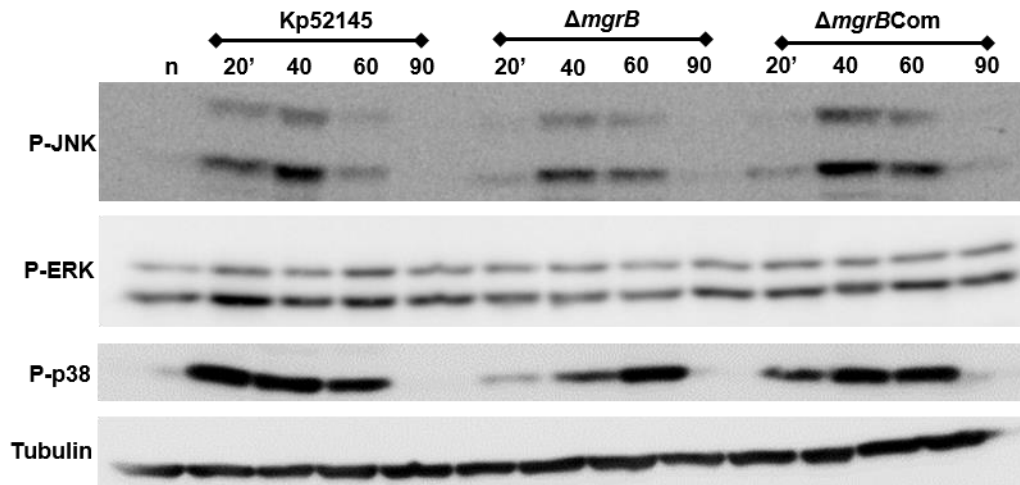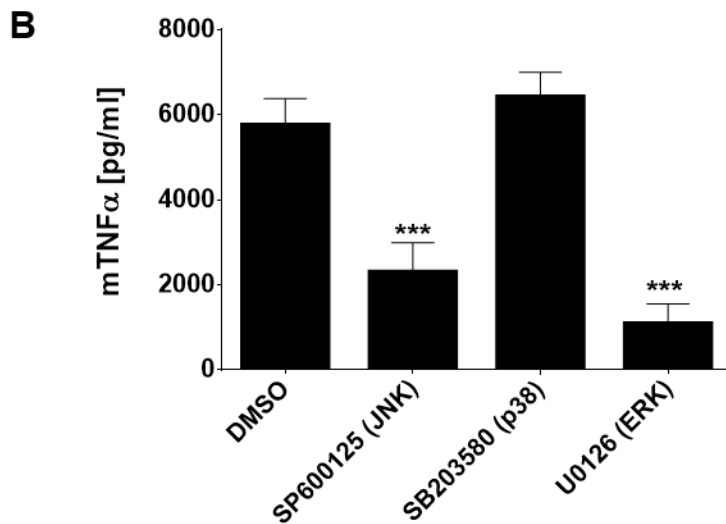

### Appendix Figure S8.

(A) Early inflammatory responses were analysed by immunoblot of phospho-ERK (P-ERK), phospho-p38 (P-p38), phospho-JNK (P-JNK) and tubulin levels in lysates of MH-S cells infected with *K. pneumoniae* 52145, 52145- $\Delta mgrB$ , 52145- $\Delta mgrBCom$  for the indicated times. (B) TNF $\alpha$  secretion upon *K. pneumoniae* infection in iBMDM macrophages was analysed in the presence of the MAPK ERK inhibitor (U0126, 10  $\mu$ M, 2h before infection), JNK inhibitor (SP600125, 10  $\mu$ M, 2 hours before infection), p38 inhibitor (SB203580, 10  $\mu$ M, 2 hours before infection) or DMSO (vehicle solution). Macrophages were stimulated for 6 hours with  $1 \times 10^5$  UV-killed *K. pneumoniae* 52145 and TNF $\alpha$  levels were determined in the supernatant of infected cells. \*\*\*,  $P < 0.0001$ ; versus DMSO control determined using the two-way Unpaired t-test.

| Primer Name           | Sequence (5'-3') <sup>a</sup>                                                   |
|-----------------------|---------------------------------------------------------------------------------|
| <i>mgrB</i> _UPFWD    | ATA TCG CCC ATT CGT TGC CT                                                      |
| <i>mgrB</i> _UPRVS    | <u>GGA TCC</u> CCG TGG TAA GAC ATT TTT CTG CC                                   |
| <i>mgrB</i> _DWNFWD   | <u>GGA TCC</u> TTC ACT CCA CTC TCC GCA TC                                       |
| <i>mgrB</i> _DWRVRS   | GGC TAA GCA TCT CTT TCC CA                                                      |
| <i>pmrC</i> _FWD      | GAT CTC ATT GGT GTC GCA GCT CGG CGT GAA TTT GCG AAA CGT GTA GGC TGG AGC TGC TTC |
| <i>pmrC</i> _RVS      | CGA AGA TGC CAC GCA GAA AGC GGT GAT GCA TAA CGC TCC CCA TAT GAA TAT CCT CCT TAG |
| <i>pagP</i> _FWD      | TGT CCG GAA ACG CCA GCG CGT CGT TTT CAT CGA CCC TTA GGT GTA GGC TGG AGC TGC TTC |
| <i>pagP</i> _RVS      | AAG TAA ACT TAC CGT TAT TGT AGG TGC CGG GAA TAT AGG TCA TAT GAA TAT CCT CCT TAG |
| <i>pmrC</i> _checkFWD | CCT TCA CTT TGC ATC GCC AG                                                      |
| <i>pmrC</i> _checkRVS | CCT GTT CAT TCT GCT CAG C                                                       |
| <i>pagP</i> _checkFWD | TTA AGC CTC CGA CGA ACA GG                                                      |
| <i>pagP</i> _checkRVS | GCA CAA GAC CTT CCG CTT AT                                                      |
| <i>lpxO</i> _UPFWD    | CCC AGG CGC AGA TTG CCC AG                                                      |
| <i>lpxO</i> _UPRVS    | <u>GGA TCC</u> CGG ATC CGG ACT CAC TAT AGG GCG GAT ATT GAA CGG CCG ATG          |
| <i>lpxO</i> _DWNFWD   | <u>GGA TCC</u> CGG ATC CGG ACT CAC TAT AGG GGC GGT AAA TGT GGA ATG GTC G        |
| <i>lpxO</i> _DWRVRS   | TCC GTT CAC TGC GTG CCC TG                                                      |
| <i>pmrAB</i> _UPFWD   | CGA TCC TGG ATG CGG ATA AA                                                      |
| <i>pmrAB</i> _UPRVS   | <u>GGA TCC</u> AAC GTC AGC ACC CAT TGA                                          |
| <i>pmrAB</i> _DWNFWD  | <u>GGA TCC</u> CGC ACA CGT ATC CTT CAC TT                                       |
| <i>pmrAB</i> _DWRVRS  | CAG AAC GTC ACC GAC TTG AA                                                      |
| <i>pmrF</i> _UPFWD    | ACC CAT TAT AAA GGC CGC CA                                                      |
| <i>pmrF</i> _UPRVS    | <u>GGA TCC</u> GGC AGG CTA TCC TGT TCG TT                                       |
| <i>pmrF</i> _DWNFWD   | <u>GGA TCC</u> TCG GCC GCA TCT ATA ACG AC                                       |
| <i>pmrF</i> _DWRVRS   | GTG CAC ATG CCG TAC ACT TC                                                      |
| <i>pagP</i> _UPFWD    | CGG CTT CGA CGC TAA TTT                                                         |
| <i>pagP</i> _UPRVS    | <u>GGA TCC</u> AGG TAT GGT AAC CTT CGC TA                                       |
| <i>pagP</i> _DWNFWD   | <u>GGA TCC</u> TTC CCG GCA CCT ACA ATA AC                                       |
| <i>pagP</i> _DWRVRS   | ATC CTG TGC ACC ATG CTA TC                                                      |
| <i>manC</i> _UPFWD    | TCG AAA GTG CTG AGT GGT CC                                                      |
| <i>manC</i> _UPRVS    | <u>GGA TCC</u> TCA AGC GGT GCT CTT CGT TAC AG                                   |
| <i>manC</i> _DWNFWD   | <u>GGA TCC</u> TAA CTG ACC GAG AAC CAG TCC AC                                   |
| <i>manC</i> _DWRVRS   | GCC TCG TCA TCG AAC AGG AAG                                                     |
| PhoPQ_checkFWD        | ATC CTG ATG GCT GAC AAG GC                                                      |
| PhoPQ_checkRVS        | TCG GGG ATA AAC GGT AGT GG                                                      |
| <i>lpxO</i> _checkFWD | CTC GGG GTT GTA CCA GAT CG                                                      |

*Continued*

---

|                                            |                                            |
|--------------------------------------------|--------------------------------------------|
| <i>lpxO_checkRVS</i>                       | TTA ACG GCG GCT TTT TCC TG                 |
| <i>pagP_Pro_FWD</i>                        | ATC GAA TTC GCT GAT ACC GAC ATT CAC CA     |
| <i>pagP_Pro_RVS</i>                        | GGA TCC CTT CGC TAA GGG TCG ATG AAA        |
| <i>lucFF_checkFWD</i>                      | GAA GCG AAG GTT GTG GAT CT                 |
| <i>lucFF_checkRVS</i>                      | AAC CGG GAG GTA GAT GAG AT                 |
| <i>pagP_Pro_checkFWD</i>                   | GTC GTT GAC ATC GAG CAT CT                 |
| <i>phoP_Pro_checkRVS</i>                   | CAG CGC CGG TTC GAT ATA AA                 |
| <i>lpxO_Pro_checkFWD</i>                   | CTG TCC CGT GAA TTC TCC AT                 |
| <i>pmrH_Pro_checkFWD</i>                   | CGG CTG GAA CTA CGA GAT TTA C              |
| <i>pmrC_Pro_checkRVS</i>                   | CGT CGG CGA TGT TTG AGT AT                 |
| <i>cps_Pro_checkRVS</i>                    | CTA TCT TCC TGT GGC TGC TC                 |
| <i>mhPRT-FWD</i>                           | GAT CAG TCA ACG GGG GAC AT                 |
| <i>mHPRT-RVS</i>                           | GGT CCT TTT CAC CAG CAA GC                 |
| <i>mTNF<math>\alpha</math>-FWD</i>         | TTC TGT CTA CTG AAC TTC GGG GTG ATC GGT CC |
| <i>mTNF<math>\alpha</math>-RVS</i>         | GTA TGA GAT AGC AAA TCG GCT GAC GGT GTG GG |
| <i>mIFN<math>\beta</math>-FWD</i>          | ATG GTG GTC CGA GCA GAG AT                 |
| <i>mIFN<math>\beta</math>-RVS</i>          | CCA CCA CTC ATT CTG AGG                    |
| <i>mil-1<math>\beta</math>-FWD</i>         | AGA TGA AGG GCT GCT TCC AAA                |
| <i>mil-1<math>\beta</math>-RVS</i>         | AAT GGG AAC GTC ACA GAC CA                 |
| <i>mil-6-FWD</i>                           | ATG GAT GCT ACC AAA CTG GAT                |
| <i>mil-6-RVS</i>                           | TGA AGG ACT CTG GCT TTG TCT                |
| <i>mil-10-FWD</i>                          | GGA CTT TAA GGG TTA CTT GGG TTG CC         |
| <i>mil-10-RVS</i>                          | CAT GTA TGC TTC TAT GCA GTT GAT GA         |
| <i>mil-12-FWD</i>                          | GGA AGC ACG GCA GCA GAA TA                 |
| <i>mil-12-RVS</i>                          | AAC TTG AGG GAG AAG TAG GAA TGG            |
| <i>m<math>\beta</math>-defensin-1-FWD</i>  | AAC ACG GTA CAC AGG CTT CC                 |
| <i>m<math>\beta</math>-defensin-1-RVS</i>  | TCA CAG ATG TCC AAG TCC CA                 |
| <i>m<math>\beta</math>-defensin-4-FWD</i>  | CTC CAC TTG CAG CCT TTA CC                 |
| <i>m<math>\beta</math>-defensin-4-RVS</i>  | GTG CAT CCC CTA GAA CTG GA                 |
| <i>m<math>\beta</math>-defensin-14-FWD</i> | ATC TTG TTC TTG GTG CCT GC                 |
| <i>m<math>\beta</math>-defensin-14-RVS</i> | CTT CTT TCG GCA GCA TTT TC                 |

---

<sup>a</sup> Underlined text denotes a BamHI restriction site incorporated into the primer

#### **Appendix Table S4.**

Oligonucleotide primers used in this study

## Appendix References.

Aubert D, Hamad M, Valvano M (2014) A markerless deletion method for genetic manipulation of *Burkholderia cenocepacia* and other multidrug-resistant gram-negative bacteria. In Host-Bacteria Interactions, Vergunst AC, O'Callaghan D (eds) pp 311-327. Springer New York

Brisse S, Fevre C, Passet V, Issenhuth-Jeanjean S, Tournebize R, Diancourt L, Grimont P (2009) Virulent clones of *Klebsiella pneumoniae*: identification and evolutionary scenario based on genomic and phenotypic characterization. PLoS One 4: e4982

Choi KH, Gaynor JB, White KG, Lopez C, Bosio CM, Karkhoff-Schweizer RR, Schweizer HP (2005) A Tn7-based broad-range bacterial cloning and expression system. Nat Methods 2: 443-448

Crépin S, Harel J, Dozois CM (2012) Chromosomal complementation using Tn7 transposon vectors in Enterobacteriaceae. Appl Environ Microbiol 78: 6001-6008

Datsenko KA, Wanner BL (2000) One-step inactivation of chromosomal genes in *Escherichia coli* K-12 using PCR products. Proc Natl Acad Sci U S A 97: 6640-6645

Demarre G, Guerout AM, Matsumoto-Mashimo C, Rowe-Magnus DA, Marliere P, Mazel D (2005) A new family of mobilizable suicide plasmids based on broad host range R388 plasmid (IncW) and RP4 plasmid (IncPalpha) conjugative machineries and their cognate *Escherichia coli* host strains. Res Microbiol 156: 245-255

Derbise A, Lesic B, Dacheux D, Ghigo JM, Carniel E (2003) A rapid and simple method for inactivating chromosomal genes in *Yersinia*. FEMS Immunol Med Microbiol 38: 113-116

Favre D, Viret JF (2000) Gene replacement in gram-negative bacteria: the pMAKSAC vectors. Biotechniques 28: 198-200, 202, 204

Gunn JS, Miller SI (1996) PhoP-PhoQ activates transcription of *pmrAB*, encoding a two-component regulatory system involved in *Salmonella typhimurium* antimicrobial peptide resistance. J Bacteriol 178: 6857-6864

Hoang TT, Karkhoff-Schweizer RR, Kutchma AJ, Schweizer HP (1998) A broad-host-range Flp-FRT recombination system for site-specific excision of chromosomally-located DNA sequences: application for isolation of unmarked *Pseudomonas aeruginosa* mutants. Gene 212: 77-86

Insua JL, Llobet E, Moranta D, Perez-Gutierrez C, Tomas A, Garmendia J, Bengoechea JA (2013) Modeling *Klebsiella pneumoniae* pathogenesis by infection of the wax moth *Galleria mellonella*. Infect Immun 81: 3552-3565

Lery LM, Frangeul L, Tomas A, Passet V, Almeida AS, Bialek-Davenet S, Barbe V, Bengoechea JA, Sansonetti P, Brisse S, Tournebize R (2014) Comparative analysis of *Klebsiella pneumoniae* genomes identifies a phospholipase D family protein as a novel virulence factor. BMC Biol 12: 41

Llobet E, Campos MA, Gimenez P, Moranta D, Bengoechea JA (2011) Analysis of the networks controlling the antimicrobial-peptide-dependent induction of *Klebsiella pneumoniae* virulence factors. Infect Immun 79: 3718-3732

Llobet E, Martinez-Moliner V, Moranta D, Dahlstrom KM, Regueiro V, Tomas A, Cano V, Perez-Gutierrez C, Frank CG, Fernandez-Carrasco H, Insua JL, Salminen TA, Garmendia J,



Bengoechea JA (2015) Deciphering tissue-induced *Klebsiella pneumoniae* lipid A structure. Proc Natl Acad Sci U S A 112: E6369-6378

Miller VL, Mekalanos JJ (1988) A novel suicide vector and its use in construction of insertion mutations: osmoregulation of outer membrane proteins and virulence determinants in *Vibrio cholerae* requires *toxR*. J Bacteriol 170: 2575-2583

Poirel L, Jayol A, Bontron S, Villegas MV, Ozdamar M, Turkoglu S, Nordmann P (2015) The *mgrB* gene as a key target for acquired resistance to colistin in *Klebsiella pneumoniae*. J Antimicrob Chemoth 70: 75-80
