# Supplementary material for: A Klebsiella pneumoniae antibiotic resistance mechanism that subdues host defences and promotes virulence
Source: PubMed Central journal article supplement (PMC5376759; doi:10.15252/emmm.201607336), 2017-02-15

**Figure 6A**

I $\kappa$ B $\alpha$

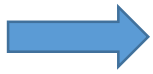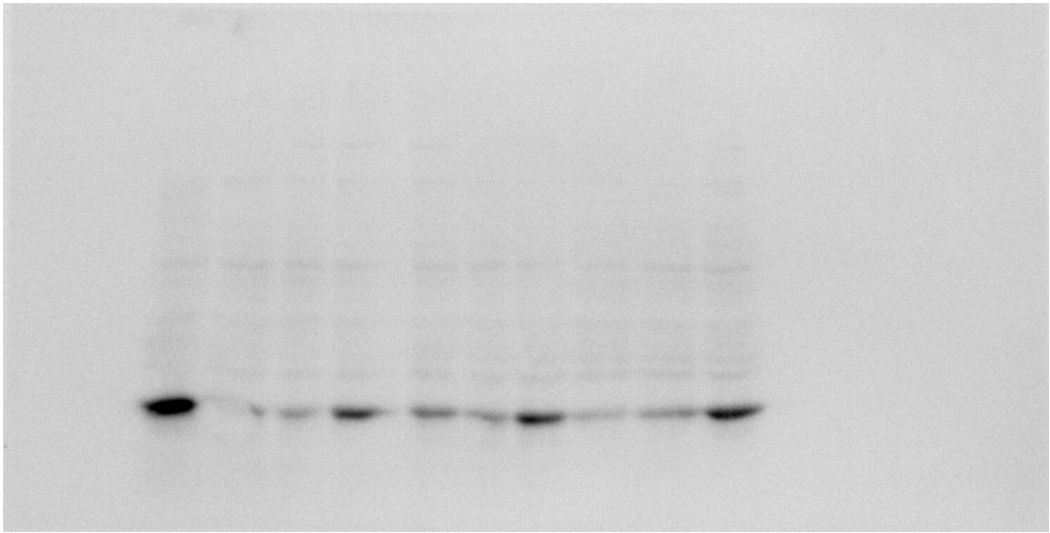

**Tubulin**

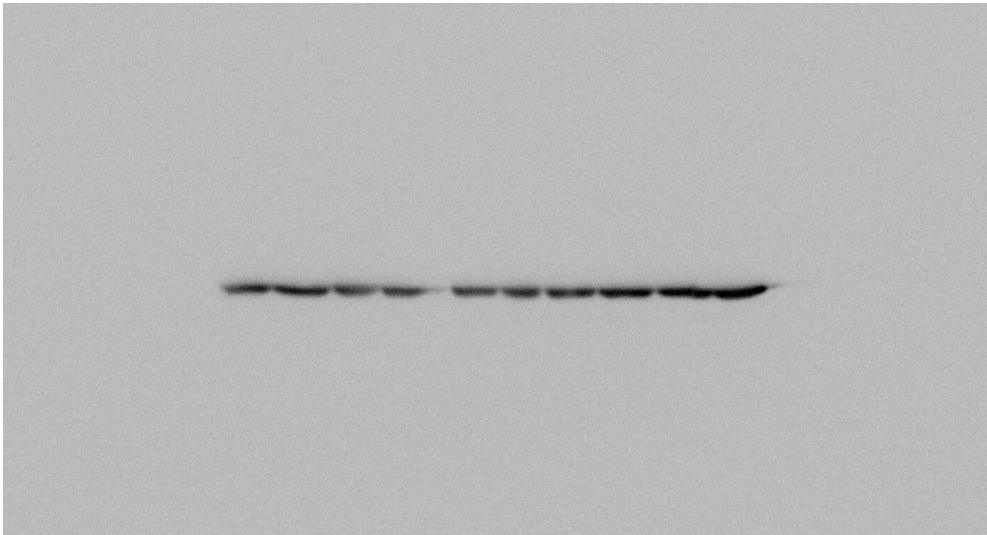

**Figure 6B**

**P-ERK**

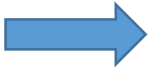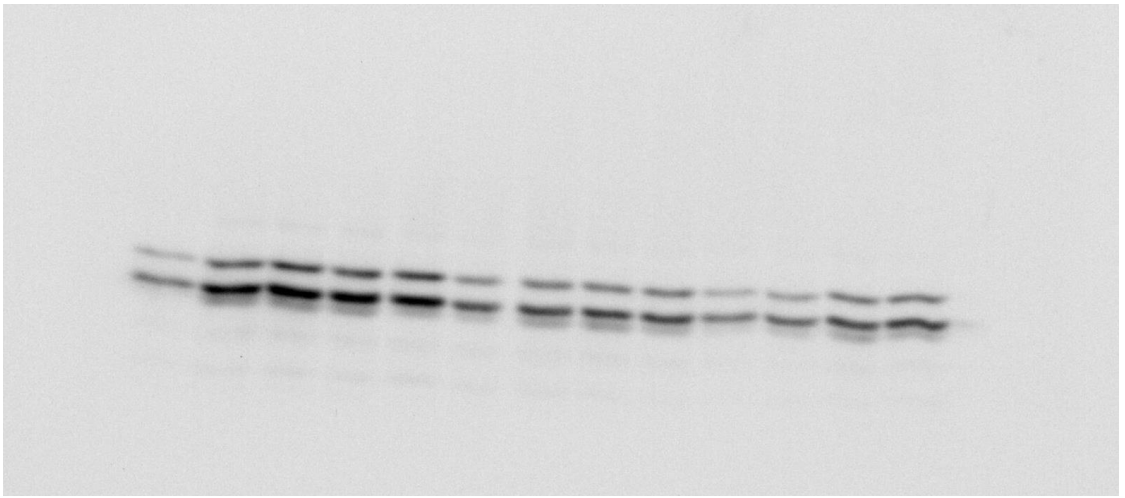

**P-p38**

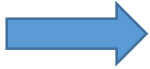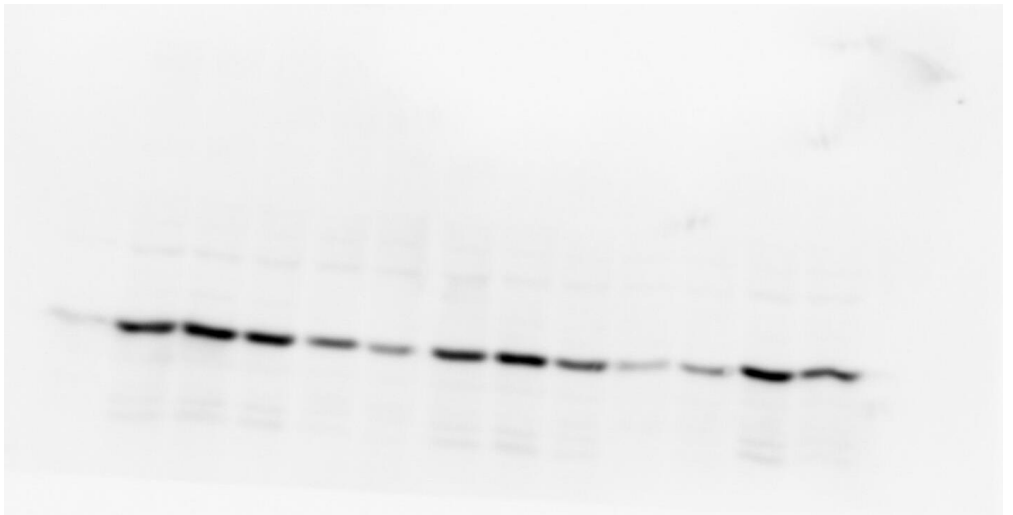

**P-JNK**

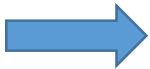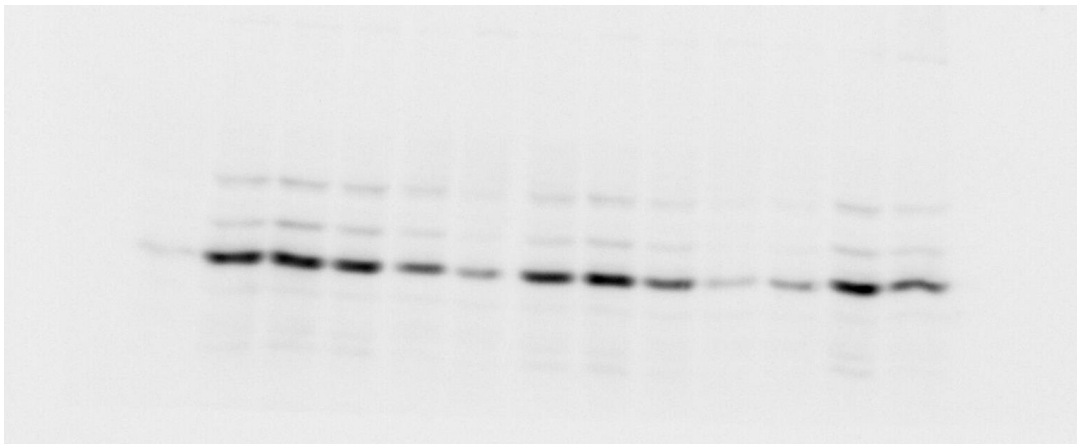

**Tubulin**

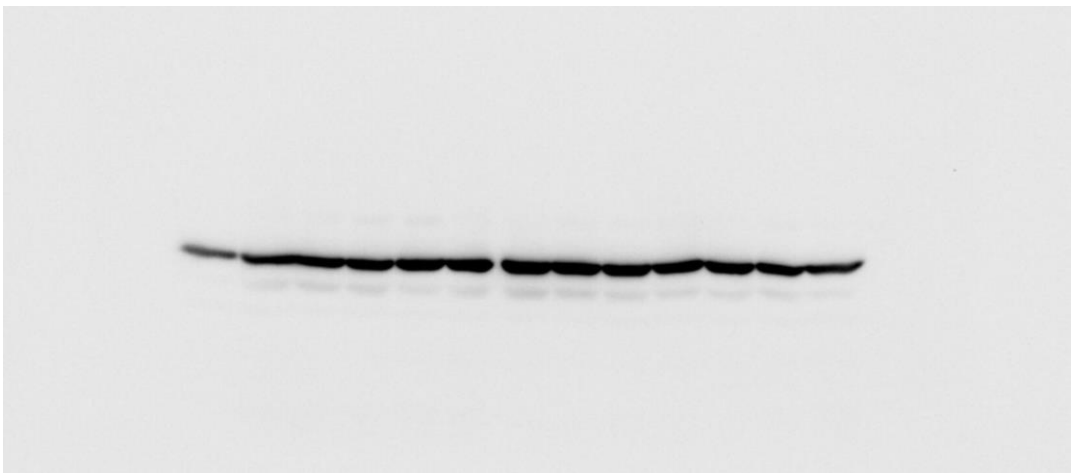

**Figure 6C**

**P-JNK**

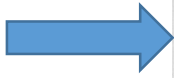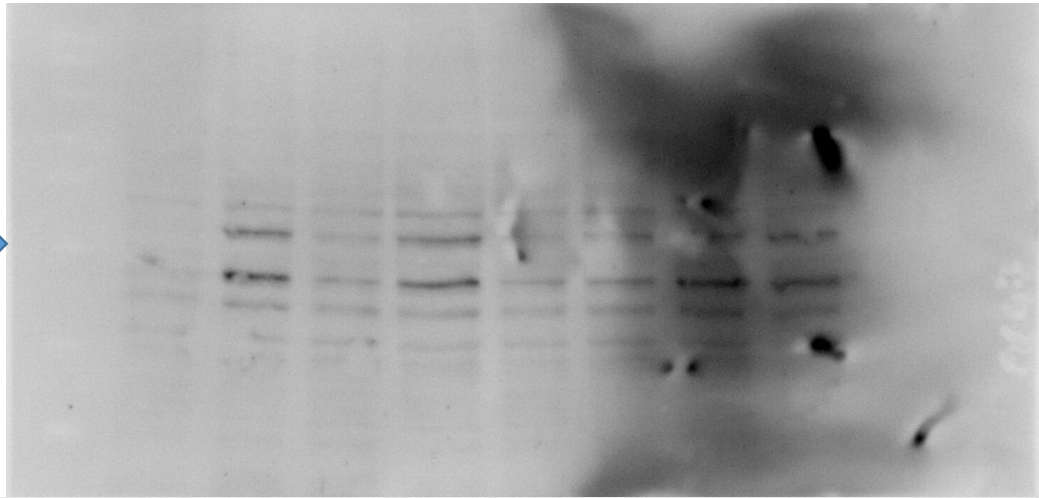

**P-ERK**

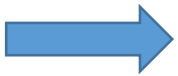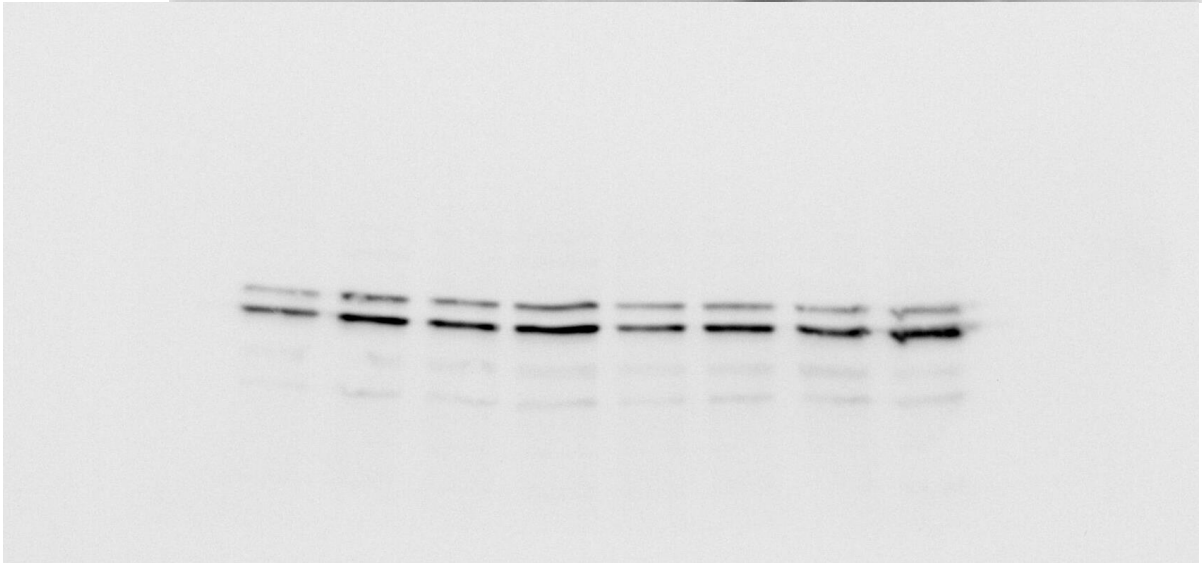

**tubulin**

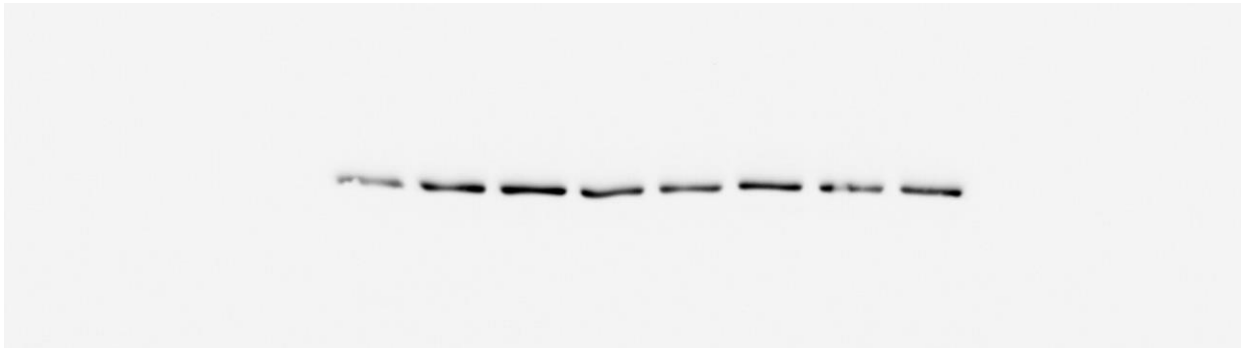

Supplement: EMMM-9-430-s003.pdf [file EMMM-9-430-s003.pdf]
