# Supplementary material for: A Klebsiella pneumoniae antibiotic resistance mechanism that subdues host defences and promotes virulence
Source: EMBO Mol Med. 2017 Feb 15;9(4):430–47. doi: 10.15252/emmm.201607336 (PMC5376759; doi:10.15252/emmm.201607336)
Supplement: Supplementary file 2 — Expanded View Figures PDF [file EMMM-9-430-s002.pdf]

## Expanded View Figures

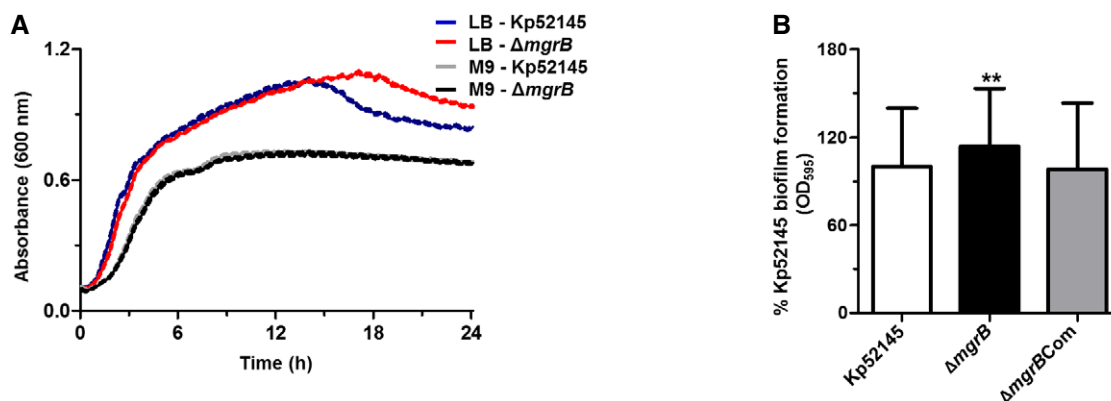

**Figure EV1. Inactivation of *mgrB* in *K. pneumoniae* 52145 is not associated with an *in vitro* fitness cost.**

A Growth kinetics of *K. pneumoniae* 52145 (blue and grey) and 52145- $\Delta mgrB$  strains (red and black) cultured in LB broth (LB) and 2% glucose M9 minimal media supplemented with thiamine and  $MgSO_4$  (M9) over 24 h at 37°C. Values are presented as the mean  $\pm$  SD of three independent experiments measured in triplicate.

B Short-term biofilm assay results for the *K. pneumoniae* 52145, 52145- $\Delta mgrB$  and 52145- $\Delta mgrB$ Com strains. Results are displayed as per cent biofilm relative to the wild-type strain with values presented as the mean  $\pm$  SD of three independent experiments. Level of significance versus 52145 (\*\* $P = 0.007$ ) was determined using two-way unpaired t-test.

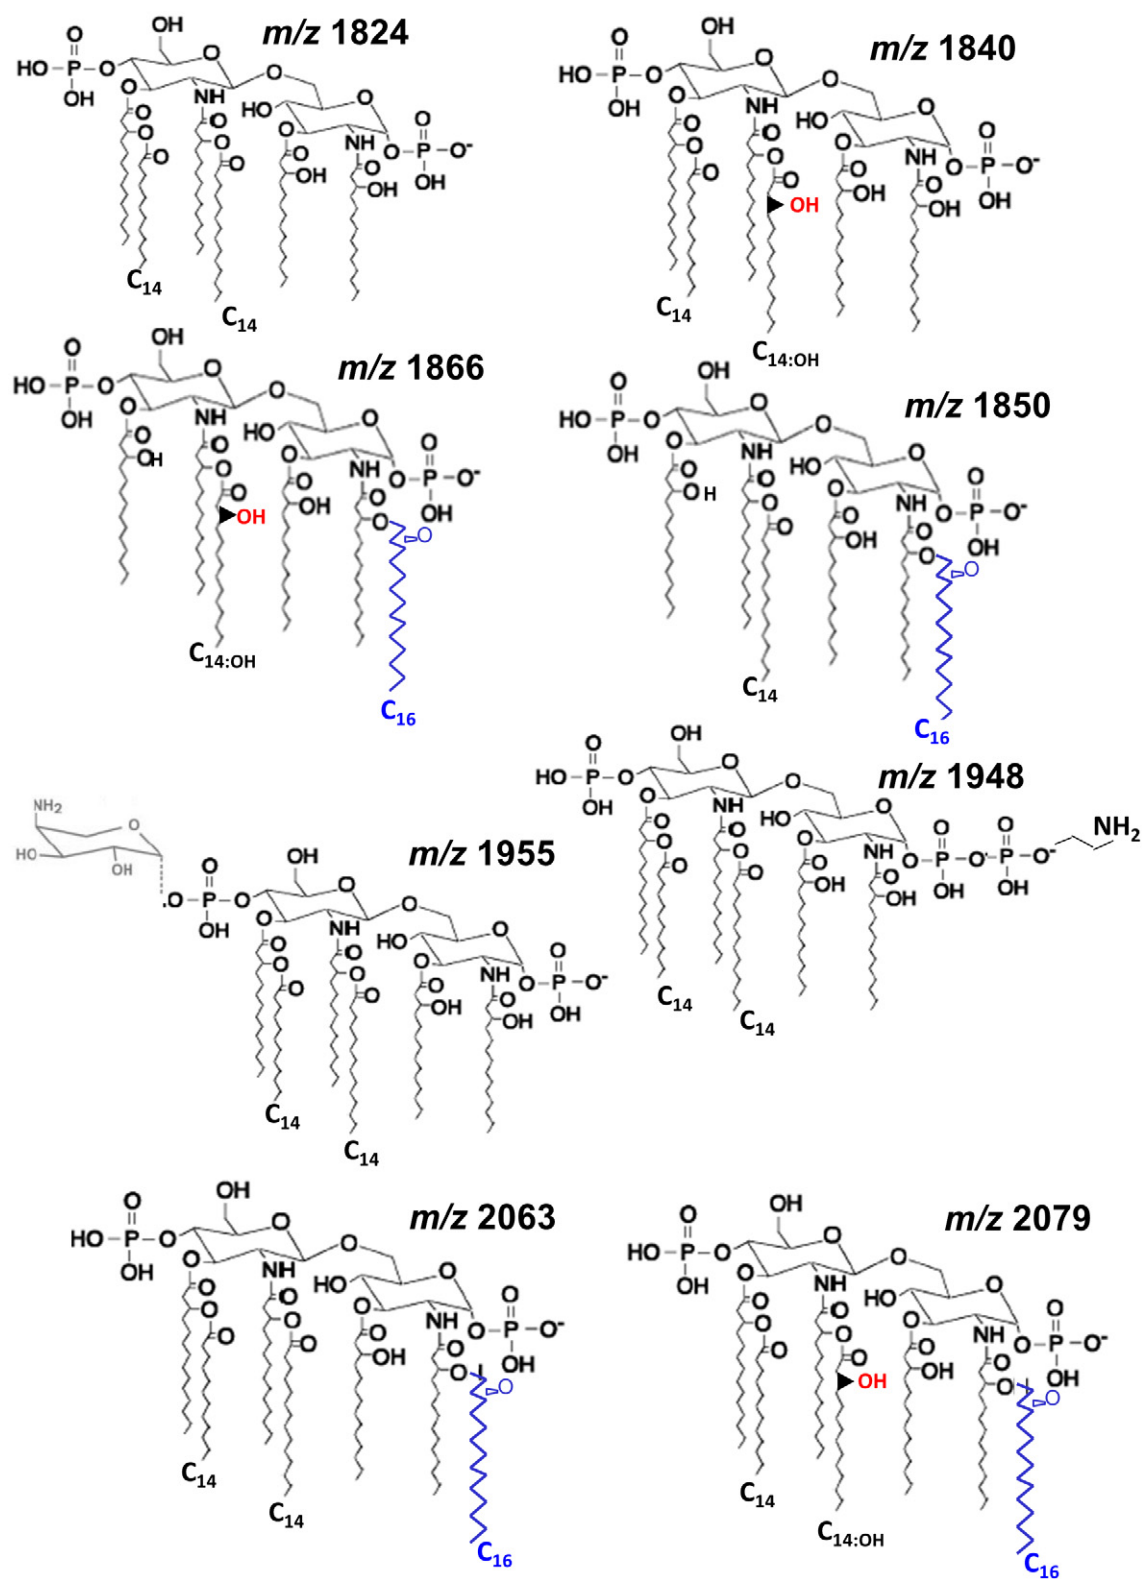

**Figure EV2. Proposed lipid A chemical structures.**

Proposed lipid A structures follow previously reported structures for *K. pneumoniae* (Sforza et al, 2004; Clements et al, 2007; Llobet et al, 2011, 2015) and other Gram-negative bacteria.

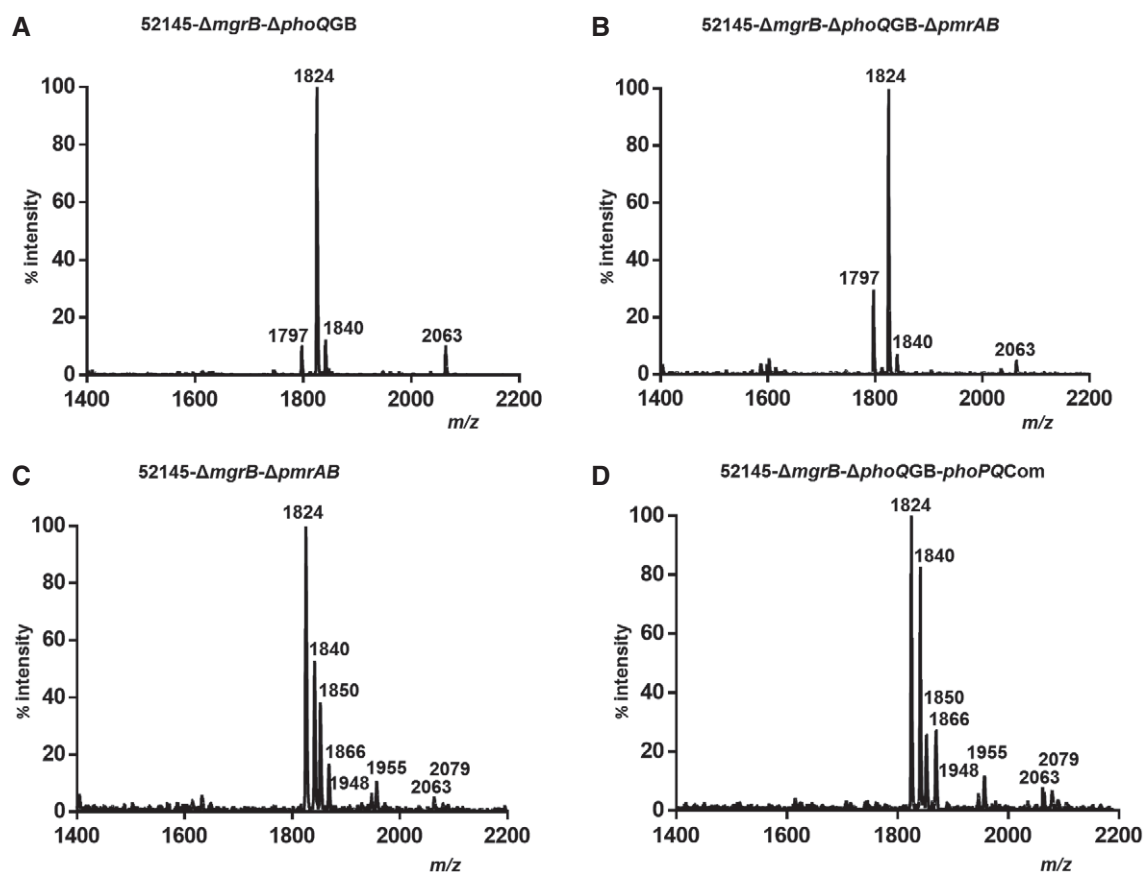

**Figure EV3.** Lipid A modifications in 52145- $\Delta mgrB$  occur in a PhoPQ-dependent manner.

A–D Negative ion MALDI-TOF mass spectrometry spectra of lipid A isolated from the *K. pneumoniae* 52145- $\Delta mgrB\Delta phoQGB$  (A), 52145- $\Delta mgrB\Delta phoQGB\Delta pmrAB$  (B), 52145- $\Delta mgrB\Delta pmrAB$  (C) and 52145- $\Delta mgrB\Delta phoQGB\text{-}phoPQCom$  (D) strains. Data represent the mass-to-charge ( $m/z$ ) ratios of each lipid A species detected and are representative of three extractions.

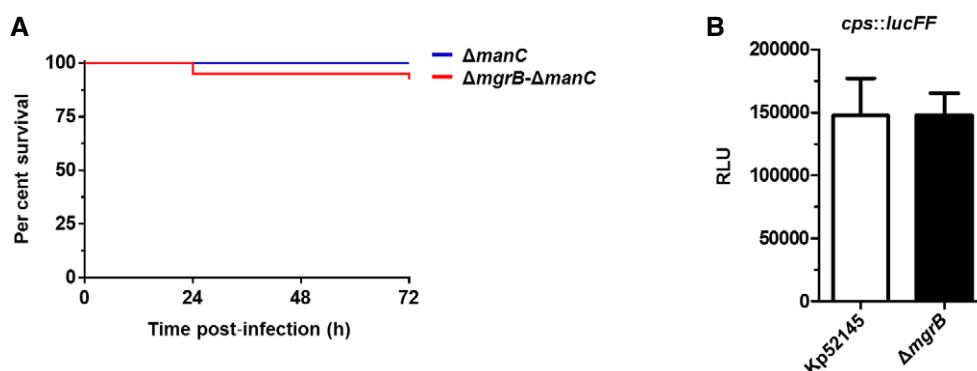

**Figure EV4.** Capsule polysaccharide (CPS) and MgrB each contribute to *K. pneumoniae* virulence in *G. mellonella*.

A Kaplan-Meier plot showing the per cent survival of *G. mellonella* over 72 h post-infection with  $10^6$  organisms of *K. pneumoniae* 52145- $\Delta manC$  (blue) and 52145- $\Delta mgrB\Delta manC$  (red). Forty larvae were infected in each group. Level of significance was determined using the log-rank (Mantel-Cox) test ( $\alpha = 0.05$ ).  
 B Activity of the *cps* promoter in *K. pneumoniae* 52145 and 52145- $\Delta mgrB$  carrying the *cps::lucFF* transcriptional fusion. Values (expressed in relative luminescence units [540 nm]) are presented as the mean  $\pm$  SD of three independent experiments measured in triplicate. Level of significance was determined using two-way unpaired *t*-test.

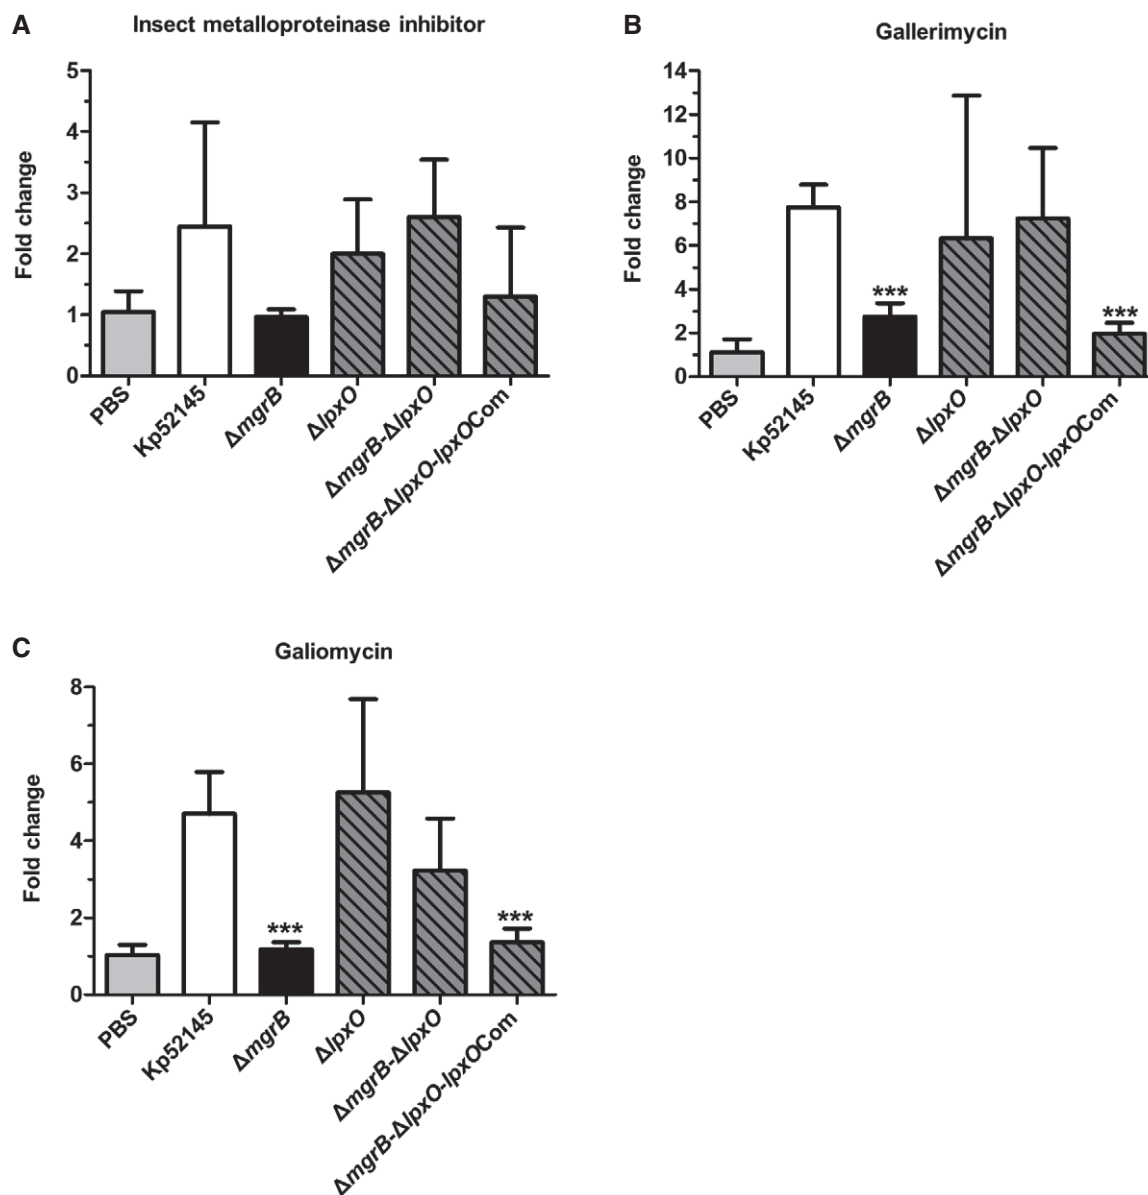

**Figure EV5.** Expression of insect metalloproteinase inhibitor, gallerimycin and galiomycin produced by *G. mellonella* during *K. pneumoniae* infection.

A–C *G. mellonella* antimicrobial peptide expression determined after 8 h of infection with *K. pneumoniae* 52145, 52145- $\Delta mgrB$ , 52145- $\Delta mgrBCom$ , 52145- $\Delta lpxO$ , 52145- $\Delta mgrB-\Delta lpxO$  and 52145- $\Delta mgrB-\Delta lpxO-lpxOCom$  by reverse transcriptase quantitative real-time PCR. Three larvae per group were infected, and values are presented as the mean  $\pm$  SD of two independent cDNA preparations measured in duplicate. \*\*\* $P < 0.0001$ ; versus 52145 determined using two-way unpaired *t*-test.
